# Supplementary material for: Behavioral syndromes are associated with social plasticity and competence in a wild primate
Source: Research Square preprint supplement (doi:10.21203/rs.3.rs-6571987/v1), 2025-05-20
Supplement: Supplementary file 1 [file e0799bad317663bf8d53f166.docx]

Supplementary Materials


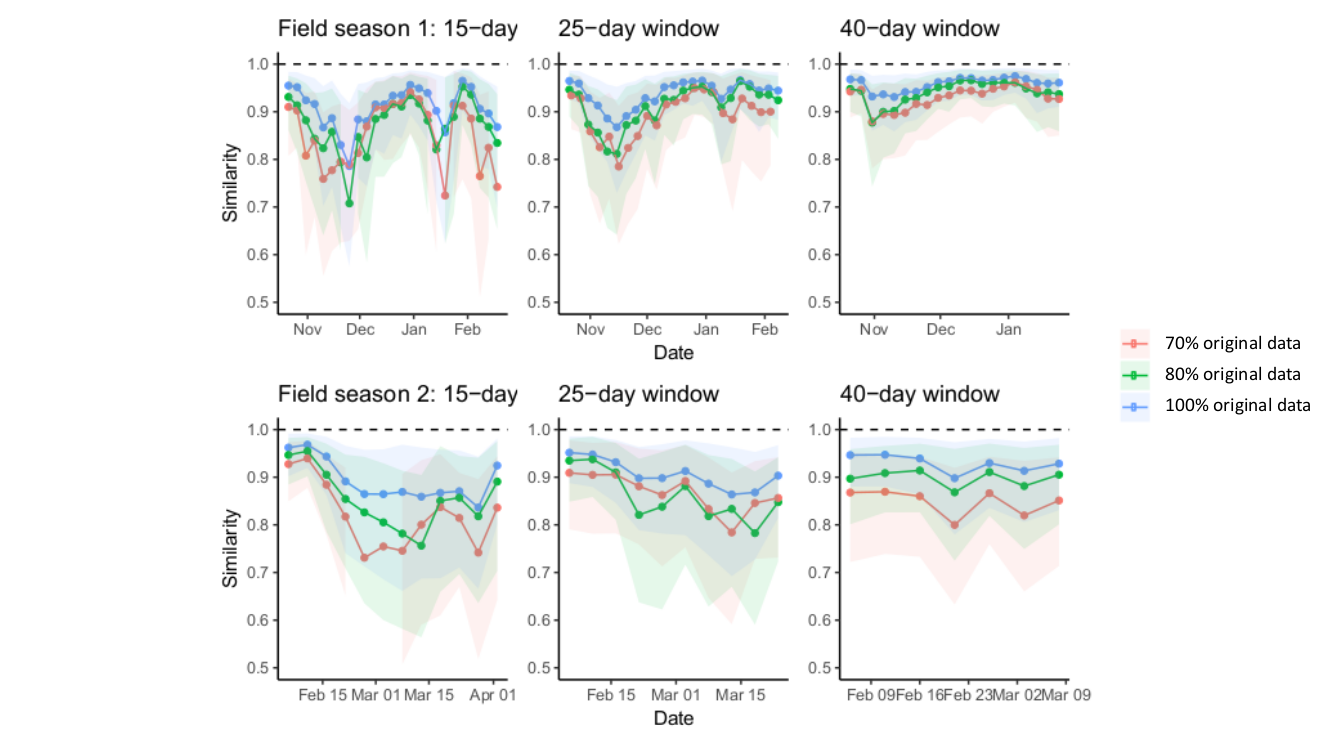


*Figure S1:* Moving time window and bootstrapping analysis of grooming networks for the Blue Group. Each row of plots represents one continuous field season of data collection (field season 1: Oct 2013-Mar 2014; field season 2: February 2015-April 2015). Each point represents the mean cosine similarity between the observed grooming networks and the bootstrapped networks, the shaded polygons represent the 95% confidence intervals of that similarity estimate, with points and polygons coloured according to the sensitivity of the bootstrapping. In each field season, three different length time windows were examined, 15-, 25-, and 40-days.


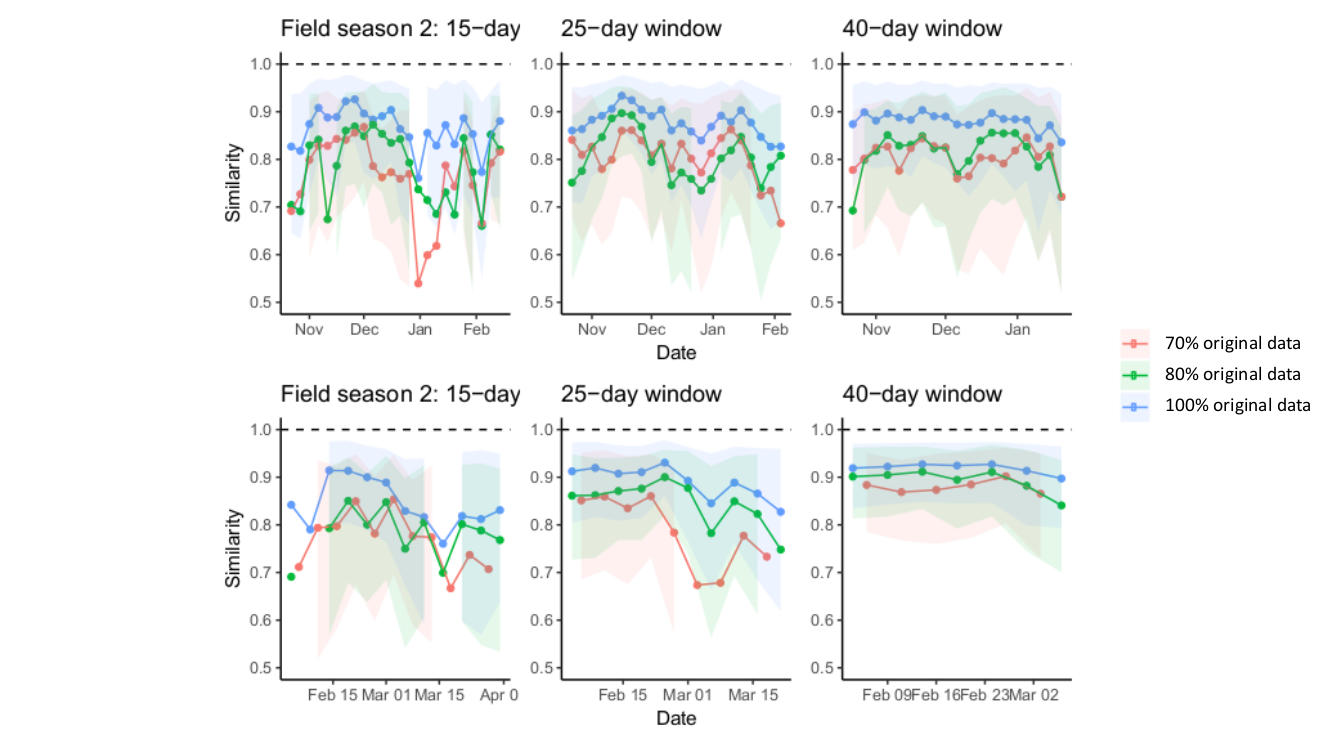


*Figure S2:* Moving time window and bootstrapping analysis of grooming networks for the Green Group. Each row of plots represents one continuous field season of data collection (field season 1: Oct 2013-Mar 2014; field season 2: February 2015-April 2015). Each point represents the mean cosine similarity between the observed grooming networks and the bootstrapped networks, the shaded polygons represent the 95% confidence intervals of that similarity estimate, with points and polygons coloured according to the sensitivity of the bootstrapping. In each field season, three different length time windows were examined, 15-, 25-, and 40-days.

*Table S3:* Summary statistics per time group per time window of data collection.

| Group | Season | Time window | Mean min temp (C) | Mean food availability | Mean anthropogenic index | Mean ± SD obs time (hrs) per subject |
| --- | --- | --- | --- | --- | --- | --- |
|  |  |  |  |  |  |  |
| Blue | Mating | 1 | 12.00 | 0.06 | 0.65 | 3.46 ± 0.82 |
| Blue | Mating | 2 | 3.30 | 0.05 | 0.74 | 5.55 ± 1.05 |
| Blue | Mating | 3 | 6.20 | 0.05 | 0.65 | 6.65 ± 1.50 |
| Blue | Mating/Non-mating 1 | 4* | 5.10 | 0.03 | 1.13 | 6.28 ± 0.62 |
| Blue | Non-mating 1 | 5 | 4.19 | 0.03 | 1.14 | 3.95 ± 0.83 |
| Blue | Non-mating 1 | 6 | 7.16 | 0.01 | 0.82 | 4.44 ± 0.90 |
| Blue | Non-mating 2 | 7 | 1.78 | 0.01 | 1.02 | 5.76 ± 1.25 |
| Blue | Non-mating 2 | 8 | 5.27 | 0.01 | 0.78 | 5.63 ± 0.86 |
| Blue | Non-mating 2 | 9 | 9.79 | 0.02 | 0.86 | 6.83 ± 0.51 |
| Blue | Whole study | - | 6.41 | 0.02 | 0.84 | 46.38 ± 1.84 |
|  |  |  |  |  |  |  |
| Green | Mating | 1 | 11.24 | 0.13 | 0.02 | 4.29 ± 0.90 |
| Green | Mating | 2 | 7.18 | 0.18 | 0.00 | 6.59 ± 0.92 |
| Green | Mating | 3 | 6.44 | 0.19 | 0.04 | 7.54 ± 0.83 |
| Green | Mating | 4 | 5.36 | 0.14 | 0.05 | 6.98 ± 0.73 |
| Green | Non-mating 1 | 5 | 4.95 | 0.06 | 0.04 | 4.75 ± 0.96 |
| Green | Non-mating 1 | 6 | 9.62 | 0 | 0.02 | 6.99 ± 0.90 |
| Green | Non-mating 2 | 7 | 2.22 | 0.14 | 0.02 | 6.40 ± 0.80 |
| Green | Non-mating 2 | 8 | 5.06 | 0.07 | 0.02 | 7.35 ± 0.89 |
| Green | Non-mating 2 | 9 | 9.27 | 0.1 | 0.17 | 7.65 ± 0.96 |
| Green | Whole study | - | 6.53 | 0.09 | 0.05 | 45.32 ± 1.09 |
|  |  |  |  |  |  |  |

** For the Blue group, the mating season concluded and the first non-mating season commenced in the middle of time window 4.*


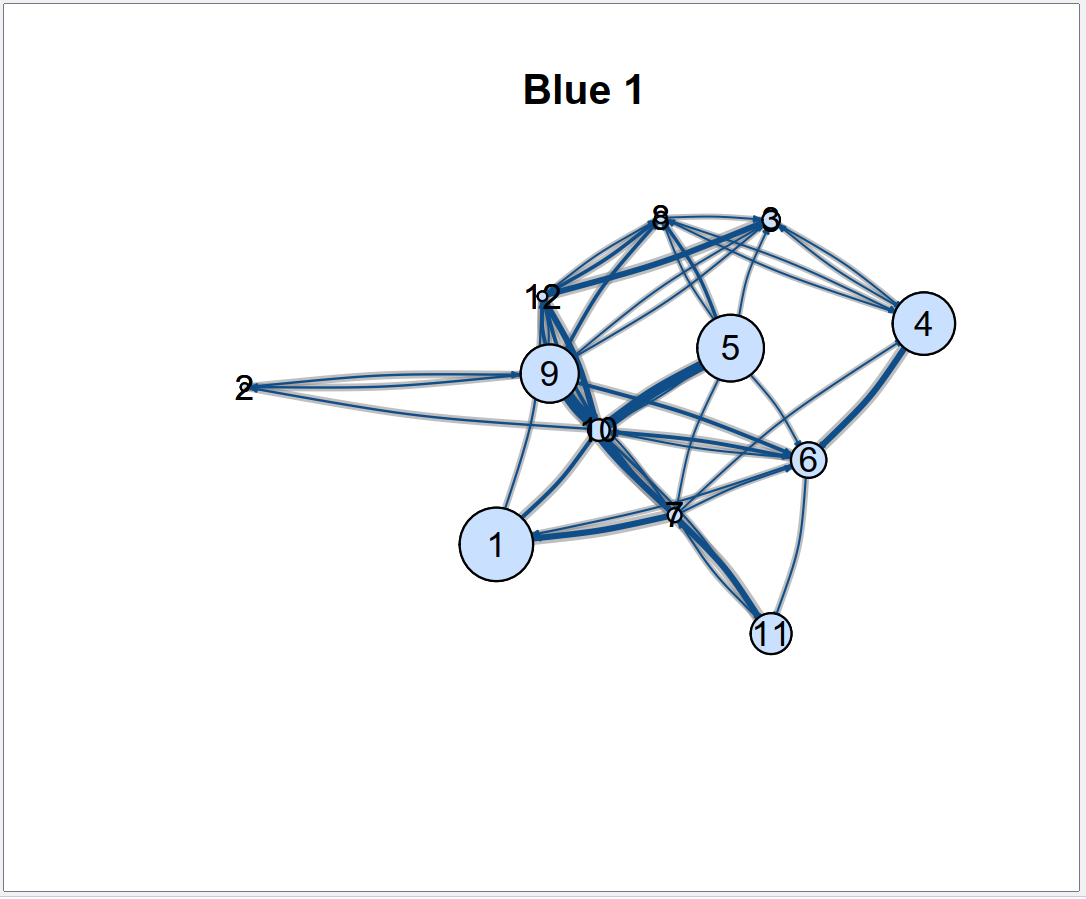


*Figure S4*: Grooming social networks for the Blue group (n=12 subjects) in time window 1. Nodes are sized based on Excitability/Boldness score (larger nodes were bolder, smaller nodes were shyer) and edges are sized based on the grooming association indices between the dyads. Dark blue edges are the median edge weight from 3000 draws of the posterior of a model estimating edge weights; the grey lines indicate the 90% credible interval around this median edge weight. The node numbers are individual identities for comparison across plots.


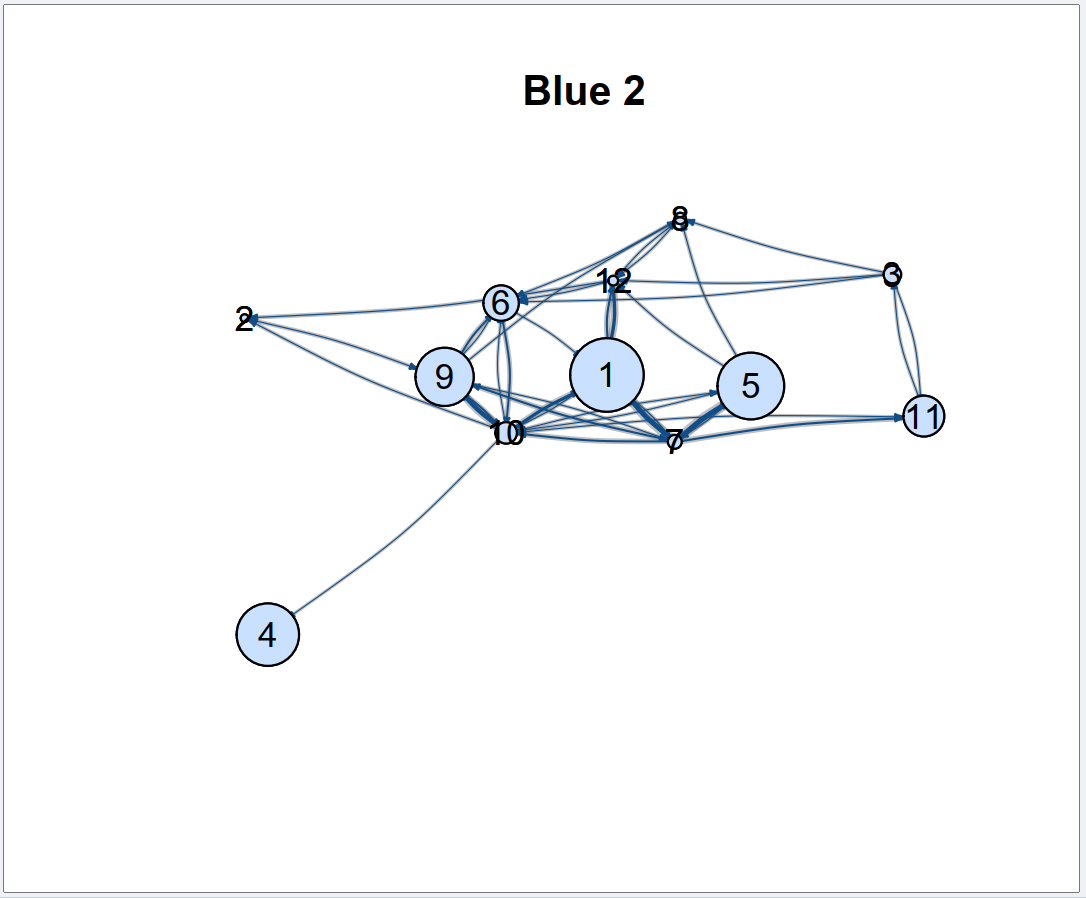


*Figure S5*: Grooming social networks for the Blue group (n=12 subjects) in time window 2. Nodes are sized based on Excitability/Boldness score (larger nodes were bolder, smaller nodes were shyer) and edges are sized based on the grooming association indices between the dyads. Dark blue edges are the median edge weight from 3000 draws of the posterior of a model estimating edge weights; the grey lines indicate the 90% credible interval around this median edge weight. The node numbers are individual identities for comparison across plots.


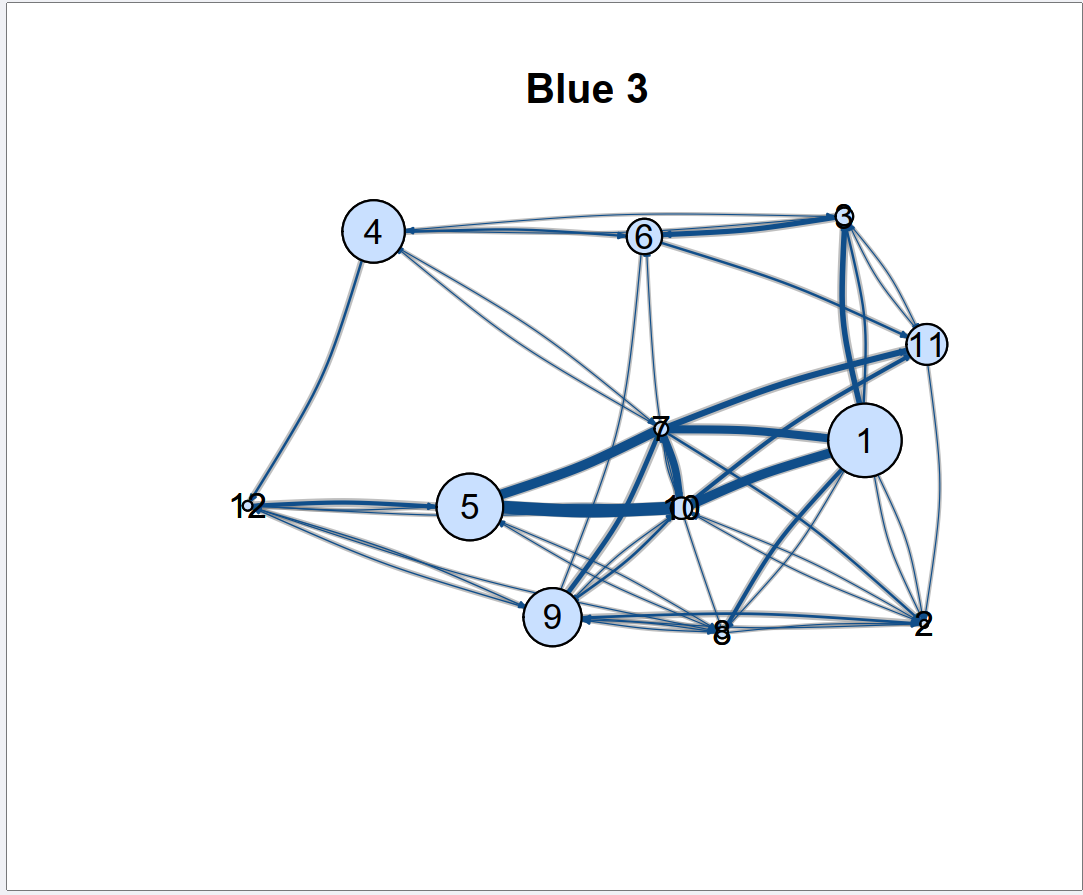


*Figure S6*: Grooming social networks for the Blue group (n=12 subjects) in time window 3. Nodes are sized based on Excitability/Boldness score (larger nodes were bolder, smaller nodes were shyer) and edges are sized based on the grooming association indices between the dyads. Dark blue edges are the median edge weight from 3000 draws of the posterior of a model estimating edge weights; the grey lines indicate the 90% credible interval around this median edge weight. The node numbers are individual identities for comparison across plots.


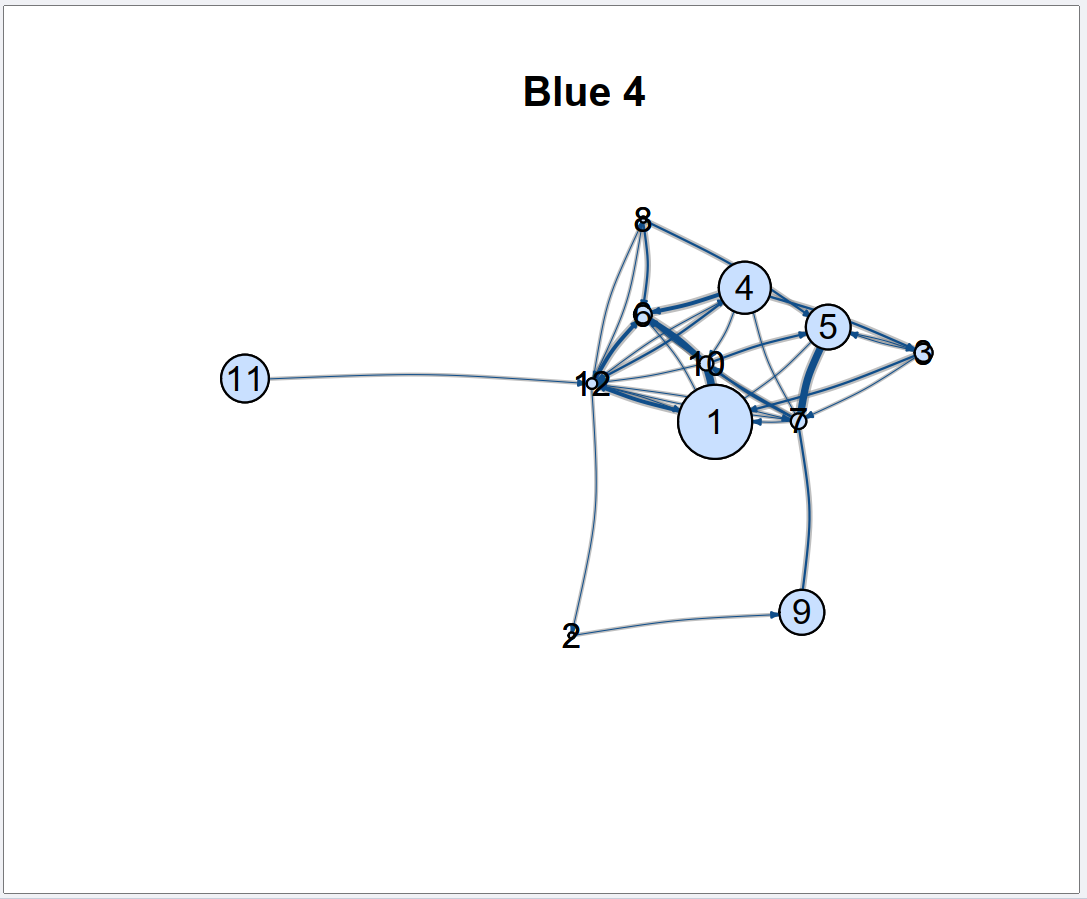


*Figure S7*: Grooming social networks for the Blue group (n=12 subjects) in time window 4. Nodes are sized based on Excitability/Boldness score (larger nodes were bolder, smaller nodes were shyer) and edges are sized based on the grooming association indices between the dyads. Dark blue edges are the median edge weight from 3000 draws of the posterior of a model estimating edge weights; the grey lines indicate the 90% credible interval around this median edge weight. The node numbers are individual identities for comparison across plots.


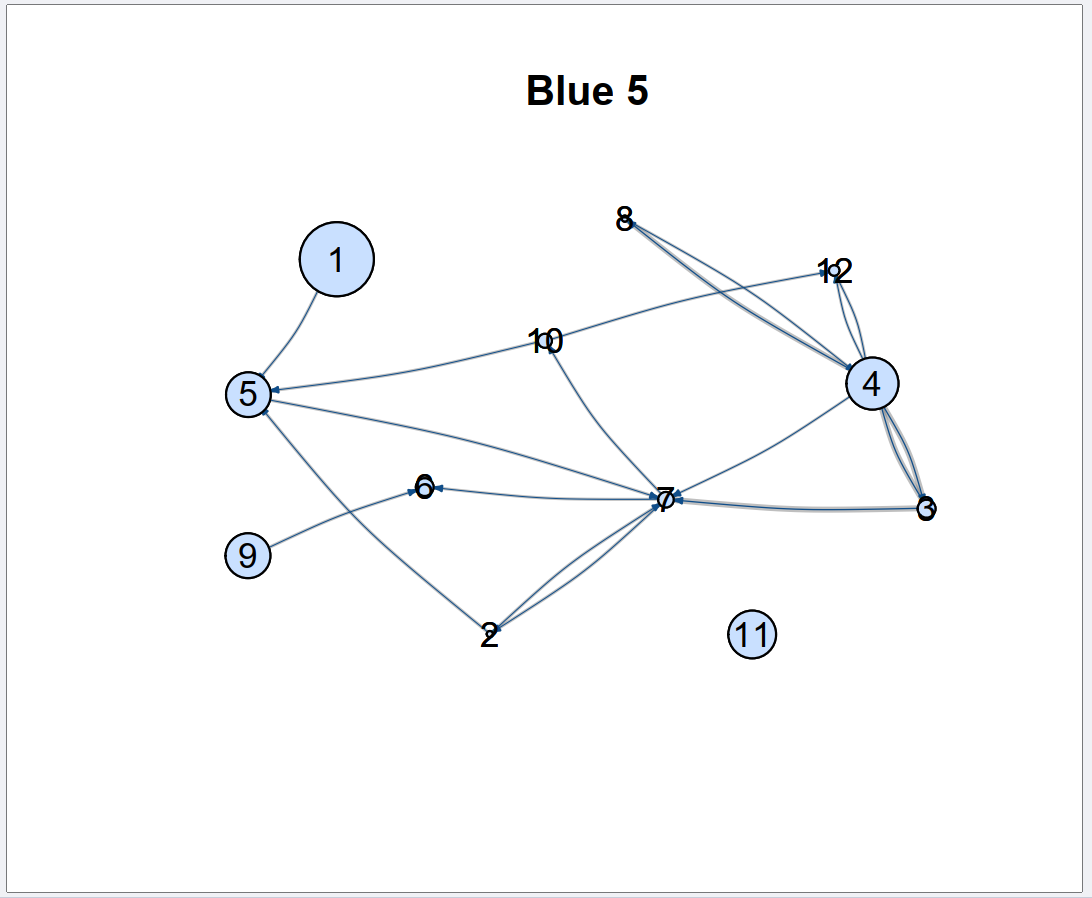


*Figure S8*: Grooming social networks for the Blue group (n=12 subjects) in time window 5. Nodes are sized based on Excitability/Boldness score (larger nodes were bolder, smaller nodes were shyer) and edges are sized based on the grooming association indices between the dyads. Dark blue edges are the median edge weight from 3000 draws of the posterior of a model estimating edge weights; the grey lines indicate the 90% credible interval around this median edge weight. The node numbers are individual identities for comparison across plots.


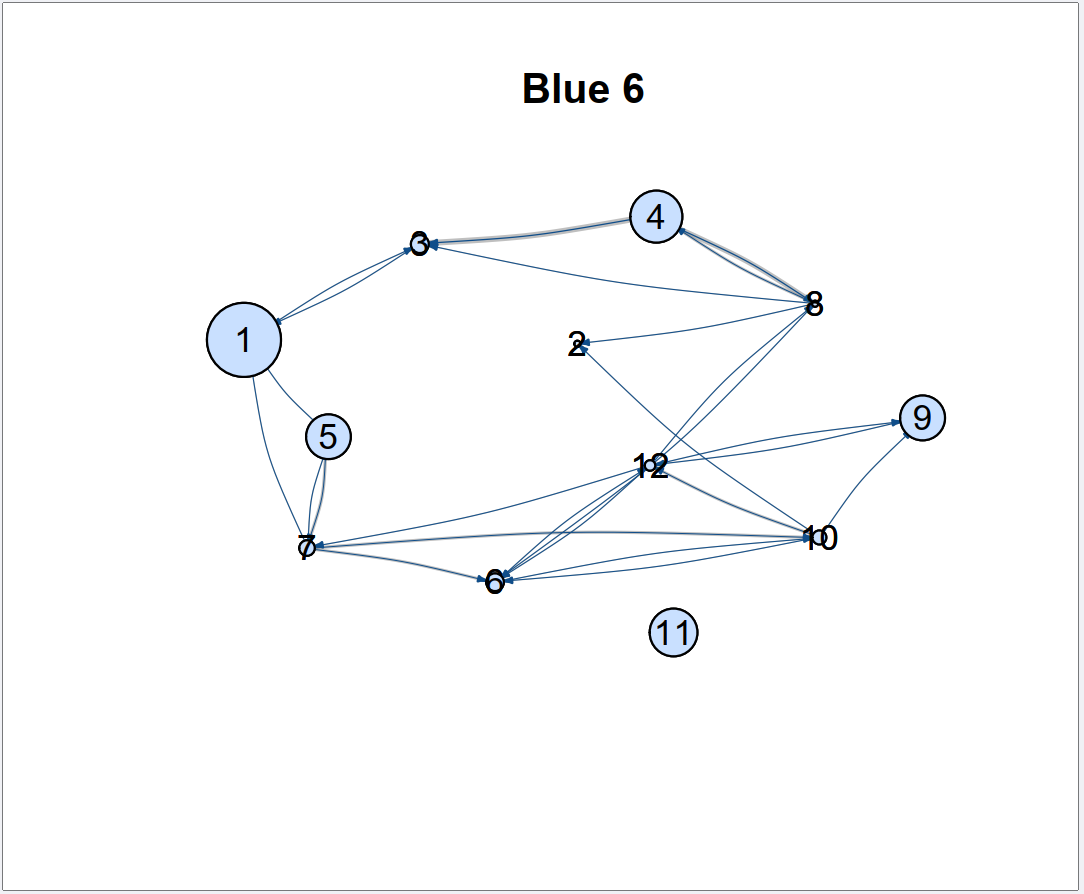


*Figure S9*: Grooming social networks for the Blue group (n=12 subjects) in time window 6. Nodes are sized based on Excitability/Boldness score (larger nodes were bolder, smaller nodes were shyer) and edges are sized based on the grooming association indices between the dyads. Dark blue edges are the median edge weight from 3000 draws of the posterior of a model estimating edge weights; the grey lines indicate the 90% credible interval around this median edge weight. The node numbers are individual identities for comparison across plots.


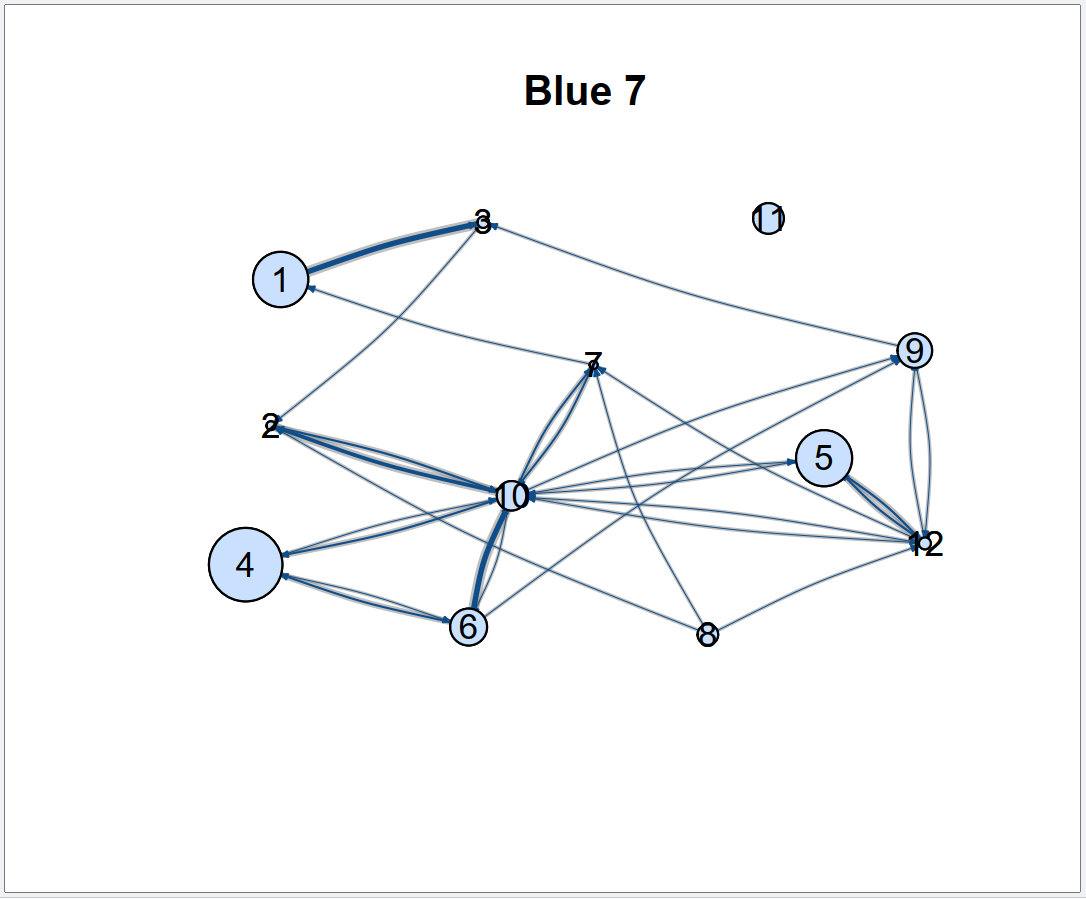


*Figure S10*: Grooming social networks for the Blue group (n=12 subjects) in time window 7. Nodes are sized based on Excitability/Boldness score (larger nodes were bolder, smaller nodes were shyer) and edges are sized based on the grooming association indices between the dyads. Dark blue edges are the median edge weight from 3000 draws of the posterior of a model estimating edge weights; the grey lines indicate the 90% credible interval around this median edge weight. The node numbers are individual identities for comparison across plots.


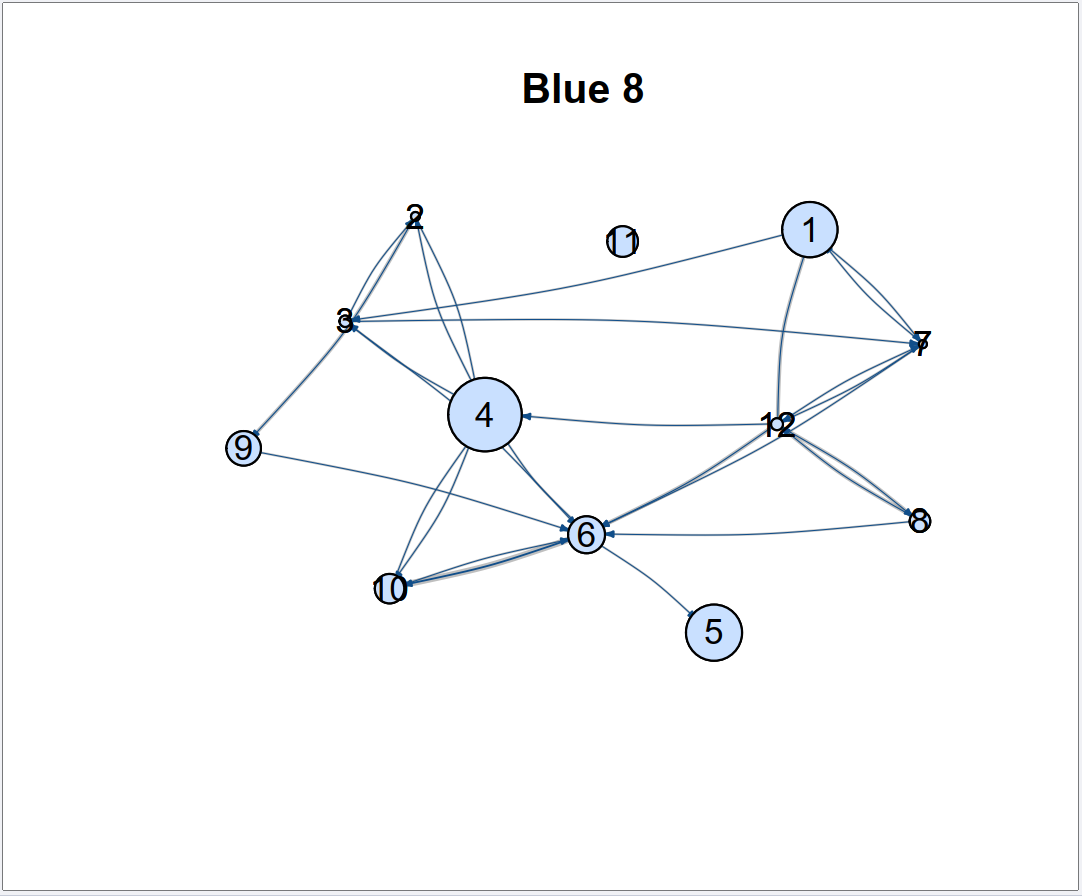


*Figure S11*: Grooming social networks for the Blue group (n=12 subjects) in time window 8. Nodes are sized based on Excitability/Boldness score (larger nodes were bolder, smaller nodes were shyer) and edges are sized based on the grooming association indices between the dyads. Dark blue edges are the median edge weight from 3000 draws of the posterior of a model estimating edge weights; the grey lines indicate the 90% credible interval around this median edge weight. The node numbers are individual identities for comparison across plots.


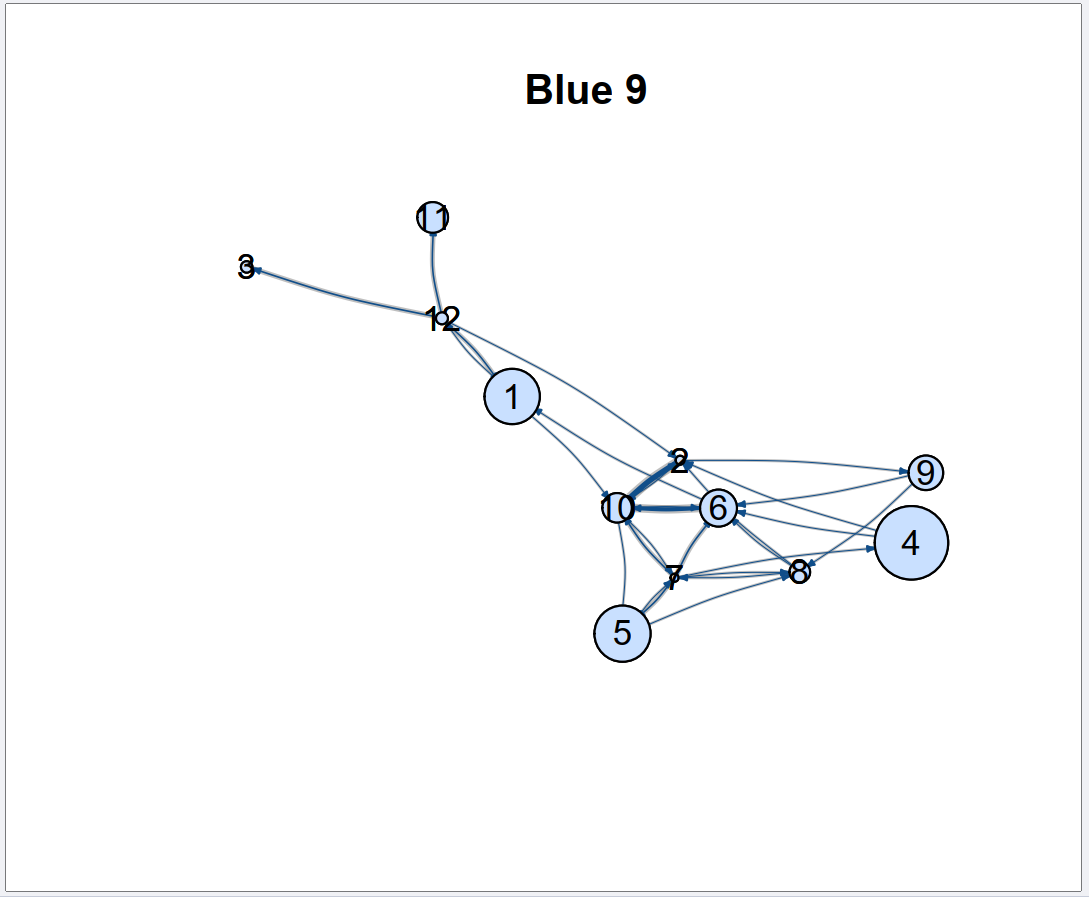


*Figure S12*: Grooming social networks for the Blue group (n=12 subjects) in time window 9. Nodes are sized based on Excitability/Boldness score (larger nodes were bolder, smaller nodes were shyer) and edges are sized based on the grooming association indices between the dyads. Dark blue edges are the median edge weight from 3000 draws of the posterior of a model estimating edge weights; the grey lines indicate the 90% credible interval around this median edge weight. The node numbers are individual identities for comparison across plots.


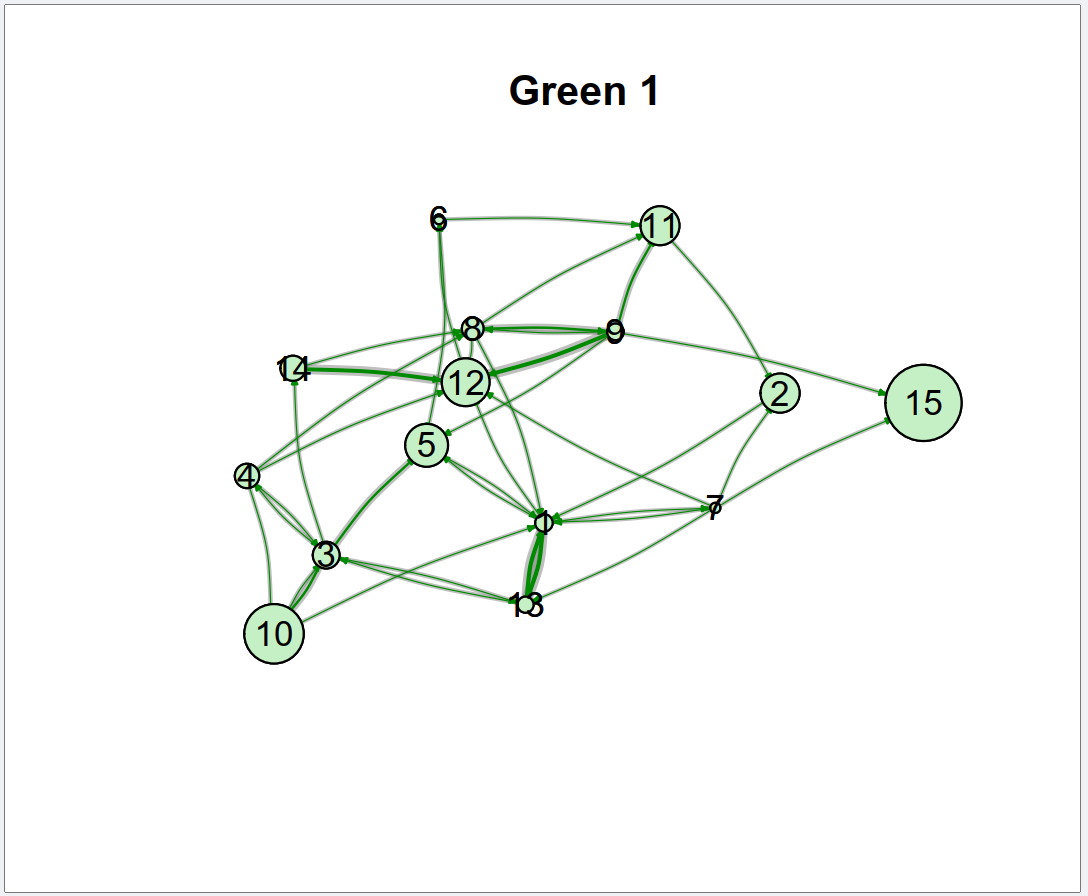


*Figure S13*: Grooming social networks for the Green group (n=15 subjects) in time window 1. Nodes are sized based on Excitability/Boldness score (larger nodes were bolder, smaller nodes were shyer) and edges are sized based on the grooming association indices between the dyads. Dark green edges are the median edge weight from 3000 draws of the posterior of a model estimating edge weights; the grey lines indicate the 90% credible interval around this median edge weight. The node numbers are individual identities for comparison across plots.


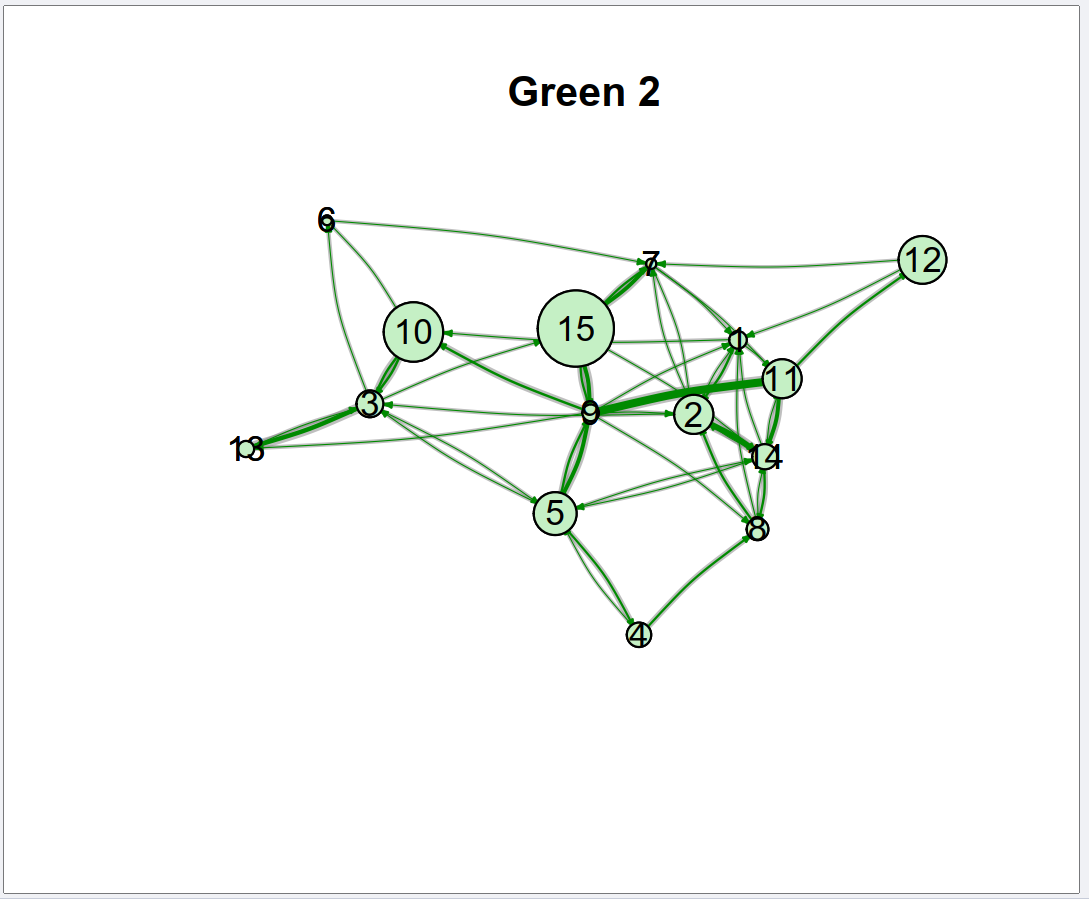


*Figure S14*: Grooming social networks for the Green group (n=15 subjects) in time window 2. Nodes are sized based on Excitability/Boldness score (larger nodes were bolder, smaller nodes were shyer) and edges are sized based on the grooming association indices between the dyads. Dark green edges are the median edge weight from 3000 draws of the posterior of a model estimating edge weights; the grey lines indicate the 90% credible interval around this median edge weight. The node numbers are individual identities for comparison across plots.


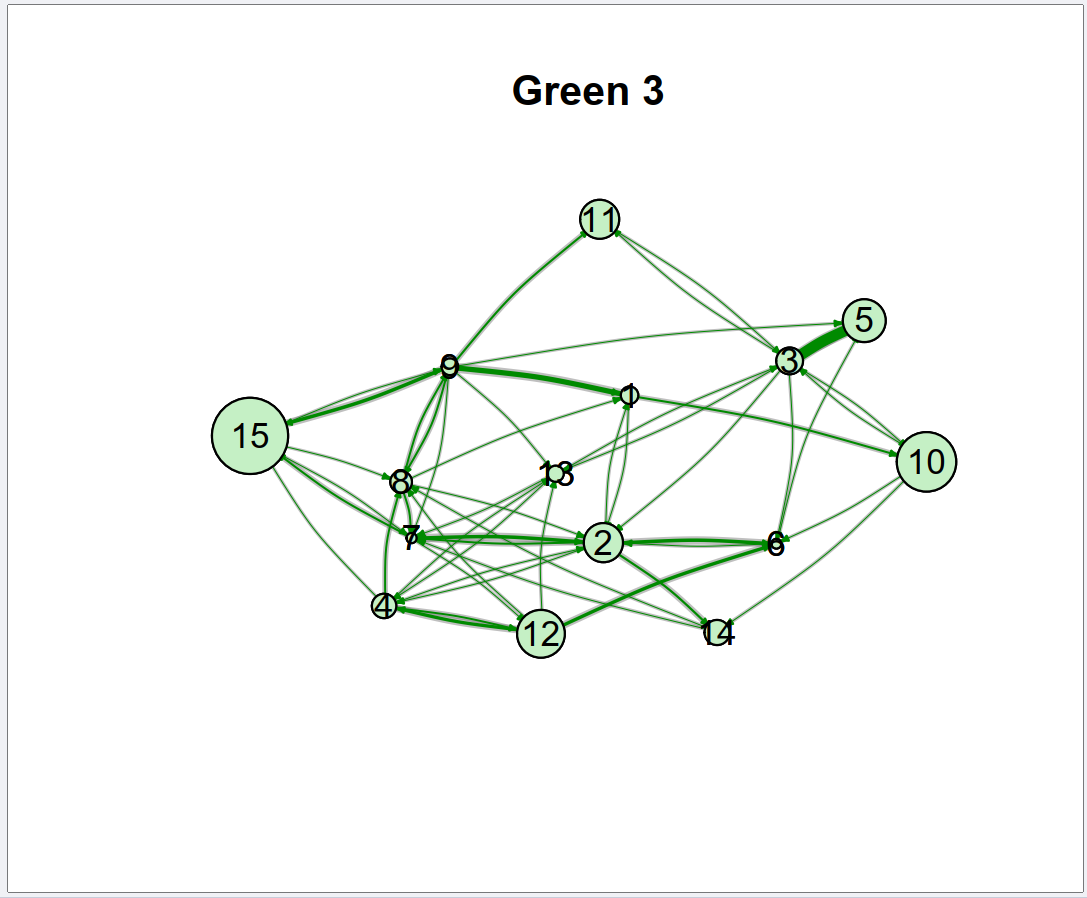


*Figure S15*: Grooming social networks for the Green group (n=15 subjects) in time window 3. Nodes are sized based on Excitability/Boldness score (larger nodes were bolder, smaller nodes were shyer) and edges are sized based on the grooming association indices between the dyads. Dark green edges are the median edge weight from 3000 draws of the posterior of a model estimating edge weights; the grey lines indicate the 90% credible interval around this median edge weight. The node numbers are individual identities for comparison across plots.


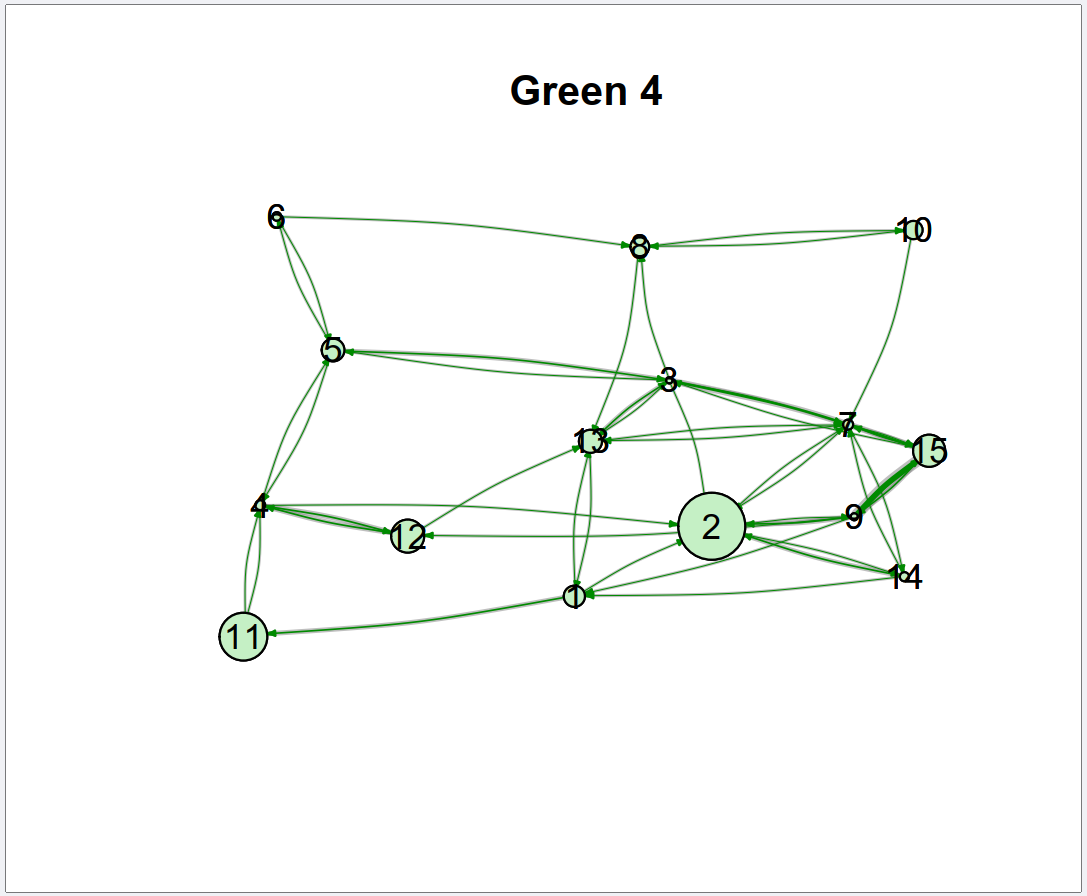


*Figure S16*: Grooming social networks for the Green group (n=15 subjects) in time window 4. Nodes are sized based on Excitability/Boldness score (larger nodes were bolder, smaller nodes were shyer) and edges are sized based on the grooming association indices between the dyads. Dark green edges are the median edge weight from 3000 draws of the posterior of a model estimating edge weights; the grey lines indicate the 90% credible interval around this median edge weight. The node numbers are individual identities for comparison across plots.


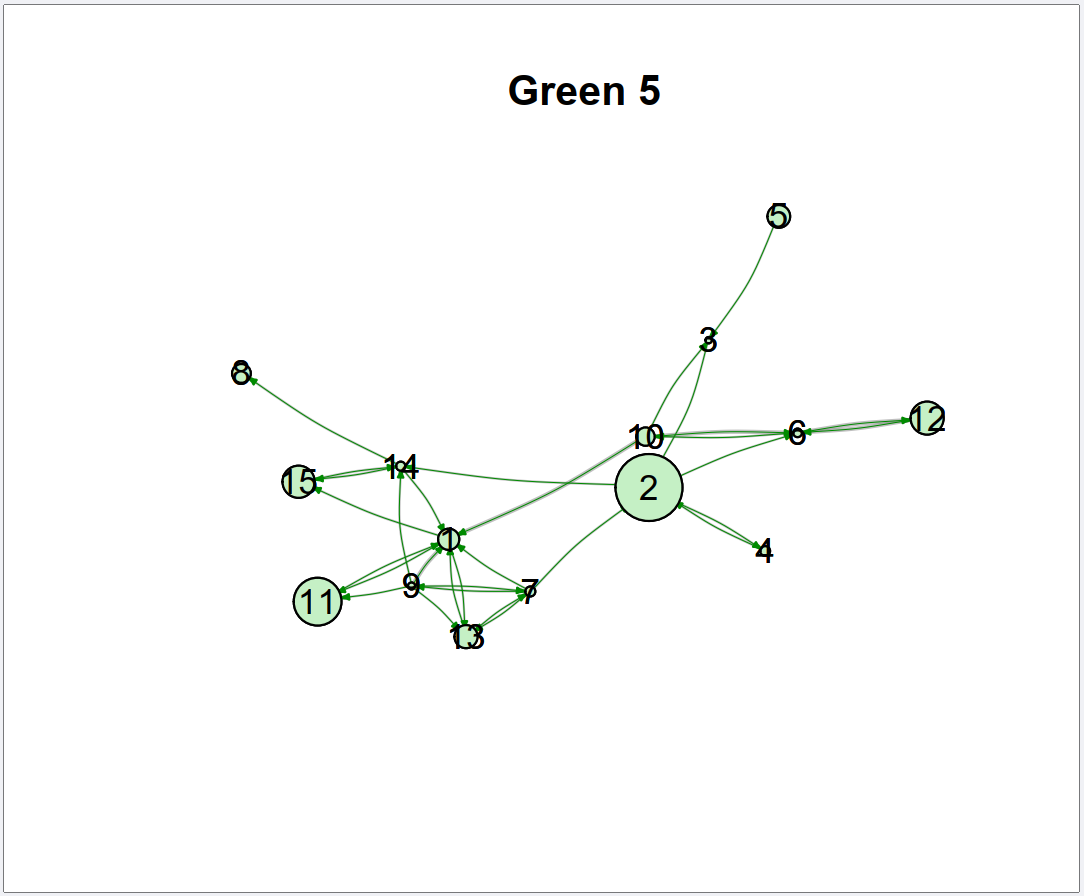


*Figure S17*: Grooming social networks for the Green group (n=15 subjects) in time window 5. Nodes are sized based on Excitability/Boldness score (larger nodes were bolder, smaller nodes were shyer) and edges are sized based on the grooming association indices between the dyads. Dark green edges are the median edge weight from 3000 draws of the posterior of a model estimating edge weights; the grey lines indicate the 90% credible interval around this median edge weight. The node numbers are individual identities for comparison across plots.


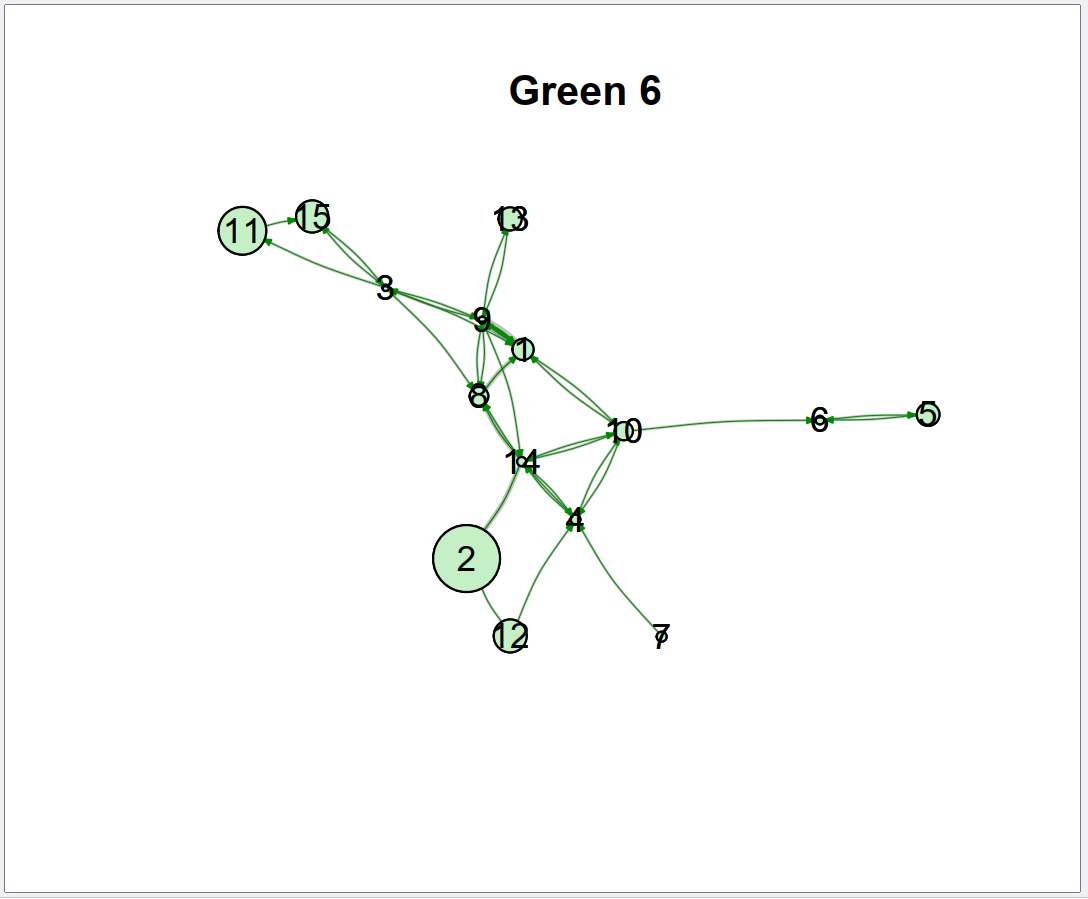


*Figure S18*: Grooming social networks for the Green group (n=15 subjects) in time window 6. Nodes are sized based on Excitability/Boldness score (larger nodes were bolder, smaller nodes were shyer) and edges are sized based on the grooming association indices between the dyads. Dark green edges are the median edge weight from 3000 draws of the posterior of a model estimating edge weights; the grey lines indicate the 90% credible interval around this median edge weight. The node numbers are individual identities for comparison across plots.


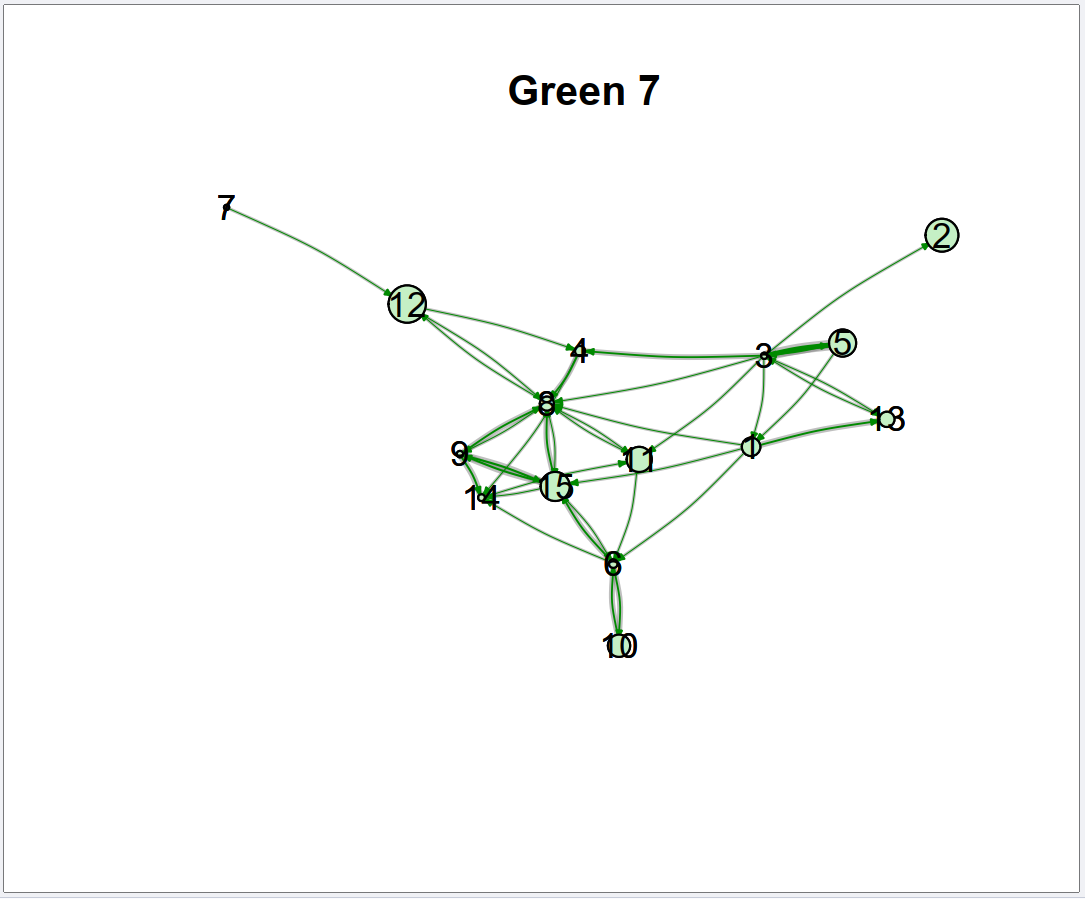


*Figure S19*: Grooming social networks for the Green group (n=15 subjects) in time window 7. Nodes are sized based on Excitability/Boldness score (larger nodes were bolder, smaller nodes were shyer) and edges are sized based on the grooming association indices between the dyads. Dark green edges are the median edge weight from 3000 draws of the posterior of a model estimating edge weights; the grey lines indicate the 90% credible interval around this median edge weight. The node numbers are individual identities for comparison across plots.


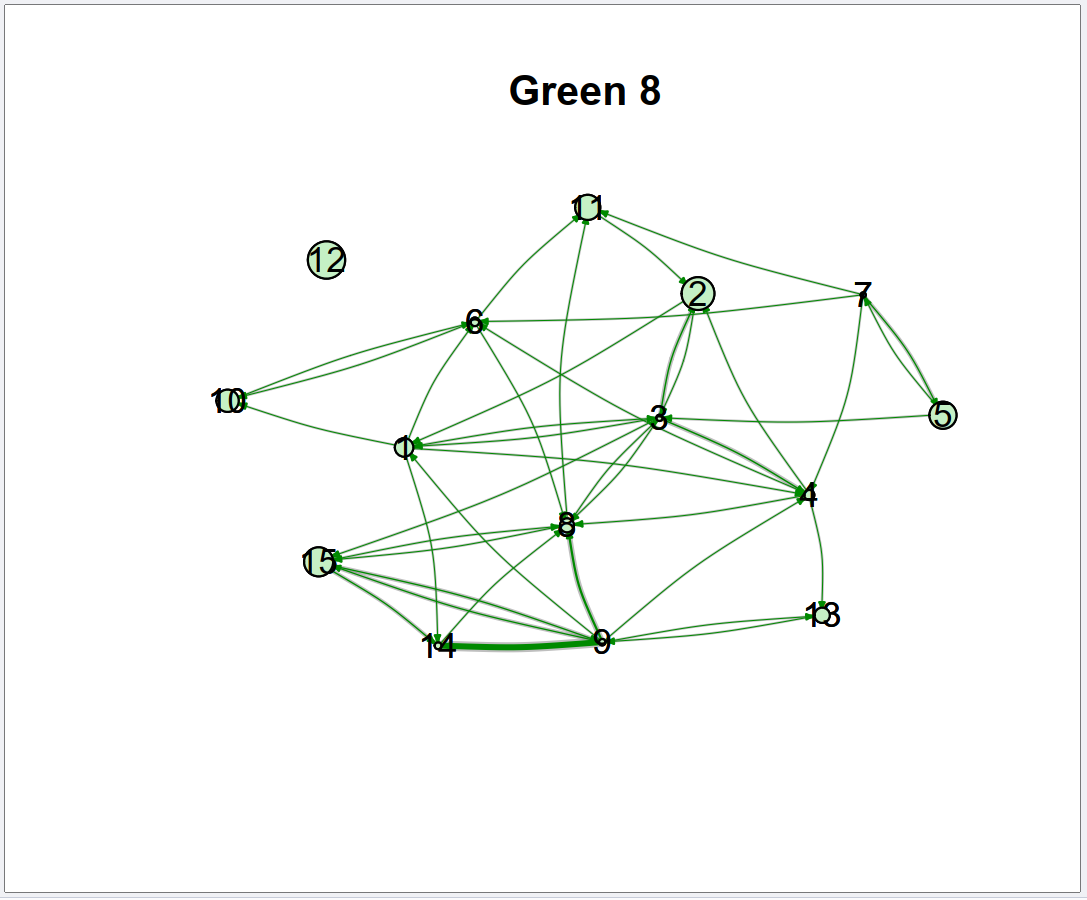


*Figure S20*: Grooming social networks for the Green group (n=15 subjects) in time window 8. Nodes are sized based on Excitability/Boldness score (larger nodes were bolder, smaller nodes were shyer) and edges are sized based on the grooming association indices between the dyads. Dark green edges are the median edge weight from 3000 draws of the posterior of a model estimating edge weights; the grey lines indicate the 90% credible interval around this median edge weight. The node numbers are individual identities for comparison across plots.


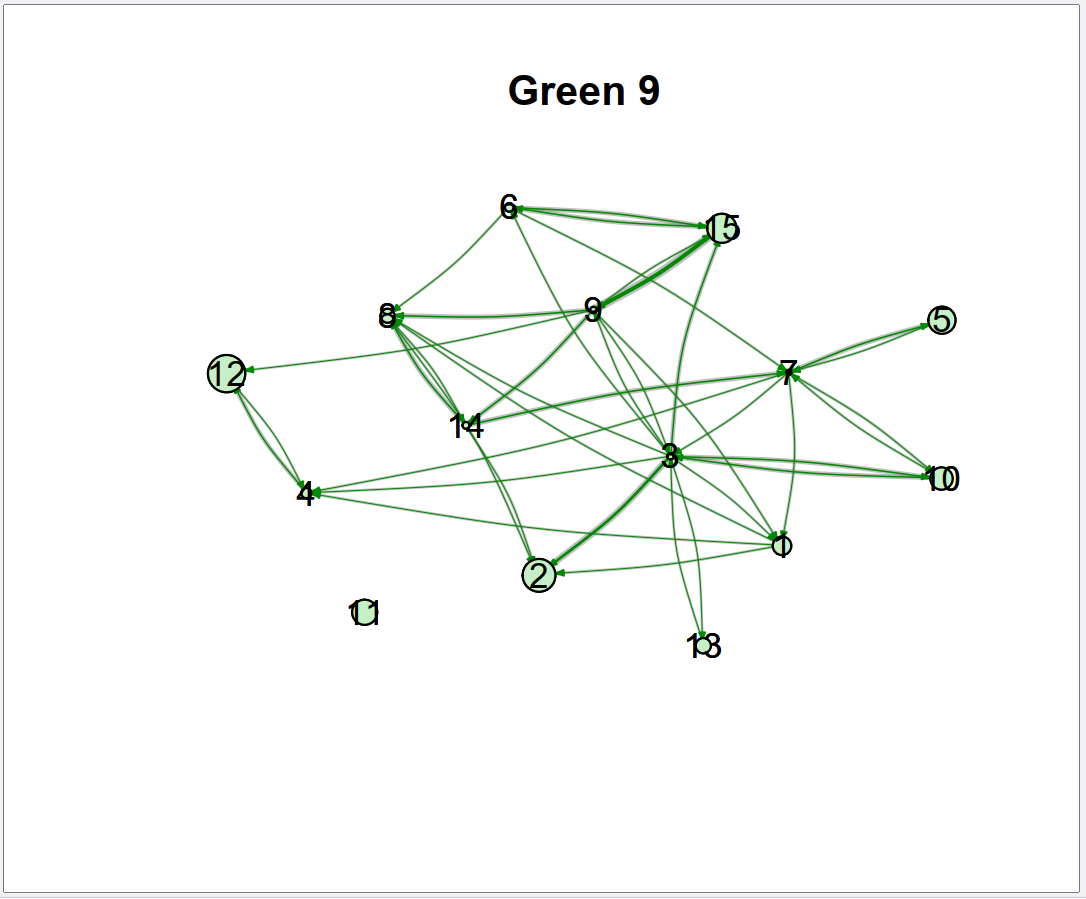


*Figure S21*: Grooming social networks for the Green group (n=15 subjects) in time window 9. Nodes are sized based on Excitability/Boldness score (larger nodes were bolder, smaller nodes were shyer) and edges are sized based on the grooming association indices between the dyads. Dark green edges are the median edge weight from 3000 draws of the posterior of a model estimating edge weights; the grey lines indicate the 90% credible interval around this median edge weight. The node numbers are individual identities for comparison across plots.

*Table S22:* Variance inflation factors (VIFs) for variables included in models.

| **Model** | **Coefficient** | **VIF** |
| --- | --- | --- |
| 1: Plasticity in Social Decision Making | Group identity | 1.231 |
| 1: Plasticity in Social Decision Making | Sex | 4.256 |
| 1: Plasticity in Social Decision Making | Excitability | 2.447 |
| 1: Plasticity in Social Decision Making | Anthropogenic presence | 1.036 |
| 1: Plasticity in Social Decision Making | Mean minimum temperature | 1.014 |
| 1: Plasticity in Social Decision Making | Conspecifics within 10 metres | 1.120 |
| 1: Plasticity in Social Decision Making | Largest rank difference with by-standers | 1.530 |
| 1: Plasticity in Social Decision Making | Individual rank | 3.228 |
| 1: Plasticity in Social Decision Making | Time of day | 1.011 |
|  |  |  |
| 2/3: Plasticity in Network Connectivity | Season | 2.963 |
| 2/3: Plasticity in Network Connectivity | Excitability | 2.798 |
| 2/3: Plasticity in Network Connectivity | Anthropogenic index | 16.483 |
| 2/3: Plasticity in Network Connectivity | Fruit availability | 4.174 |
| 2/3: Plasticity in Network Connectivity | Mean minimum temperature | 1.296 |
| 2/3: Plasticity in Network Connectivity | Individual rank | 2.914 |
| 2/3: Plasticity in Network Connectivity | Sex | 4.333 |
| 2/3: Plasticity in Network Connectivity | Group identity | 20.068 |
|  |  |  |
| 2/3: Plasticity in Network Connectivity - Group removed | Season | 1.756 |
| 2/3: Plasticity in Network Connectivity - Group removed | Excitability | 2.798 |
| 2/3: Plasticity in Network Connectivity - Group removed | Anthropogenic index | 2.570 |
| 2/3: Plasticity in Network Connectivity - Group removed | Fruit availability | 2.982 |
| 2/3: Plasticity in Network Connectivity - Group removed | Mean minimum temperature | 1.292 |
| 2/3: Plasticity in Network Connectivity - Group removed | Individual rank | 2.912 |
| 2/3: Plasticity in Network Connectivity - Group removed | Sex | 4.332 |
|  |  |  |


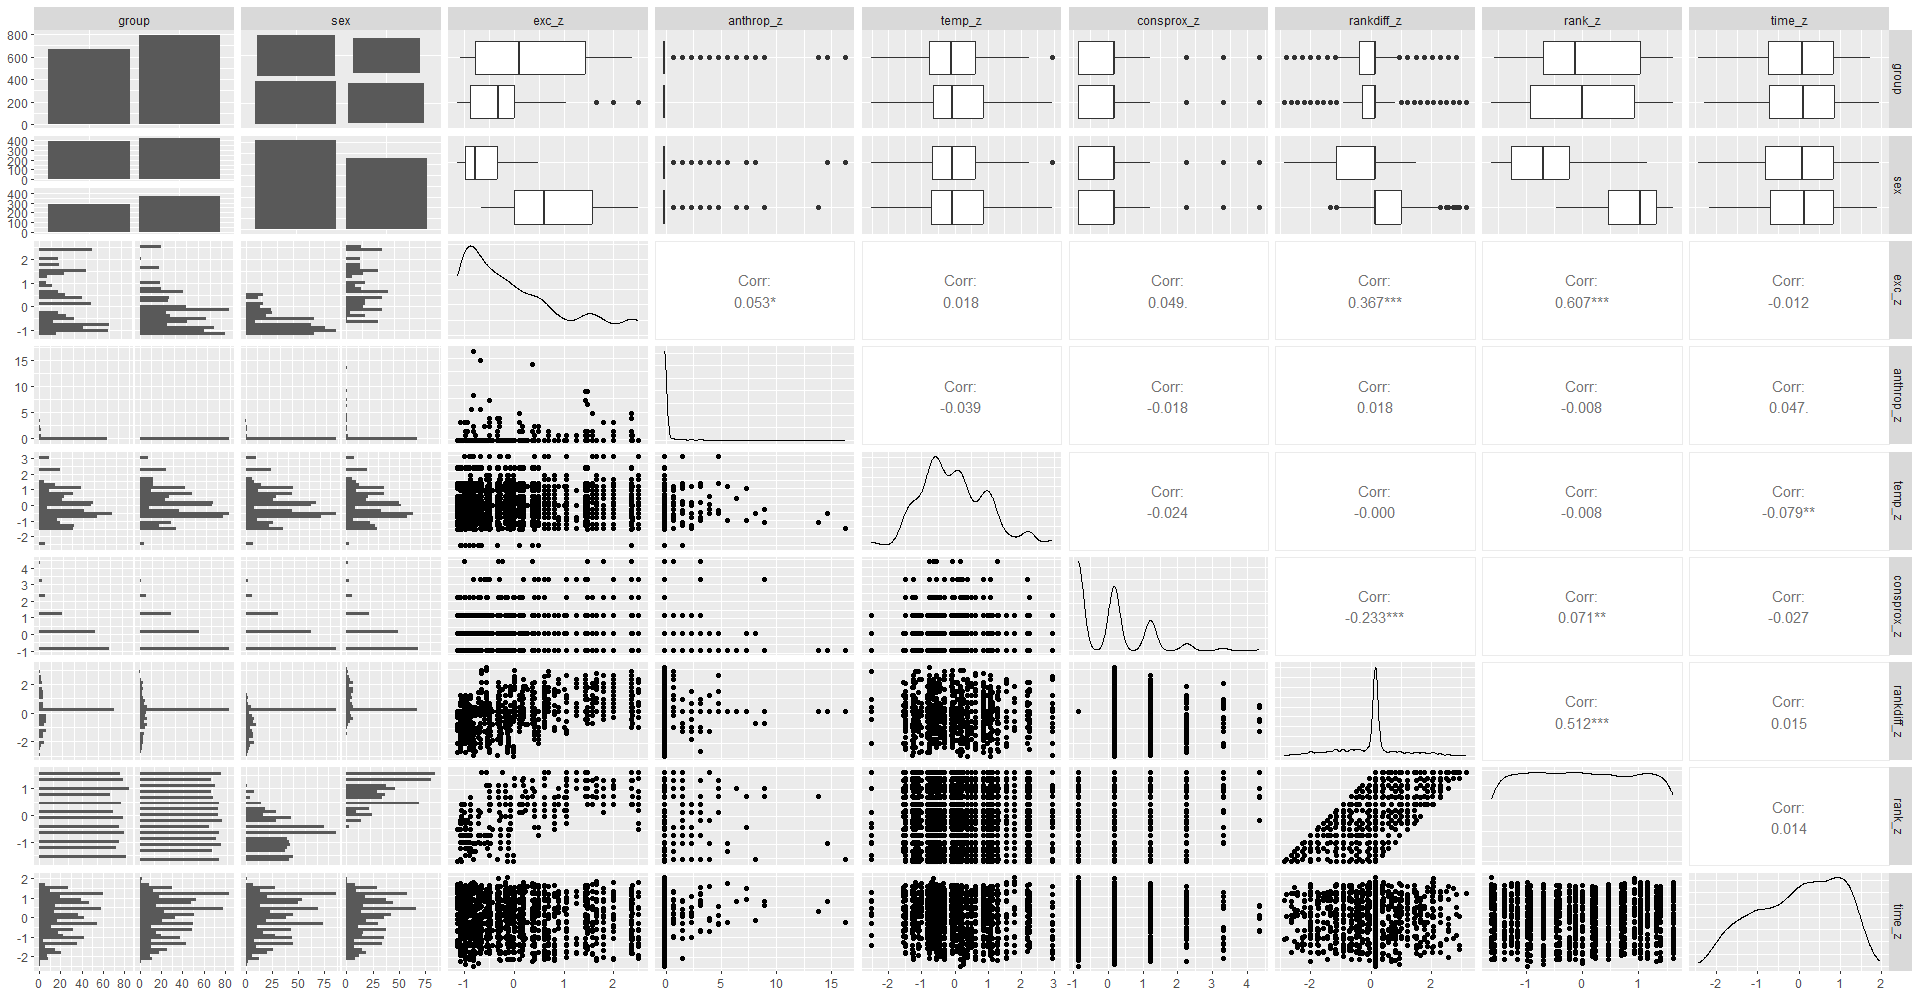


*Figure S23:* Correlations between variables included in model 1 (“Plasticity in social decision making in relation to current social environment”). The plot was generated using the *ggpairs* function of the *GGally* package (Schloerke et al, 2024; full reference in main manuscript).


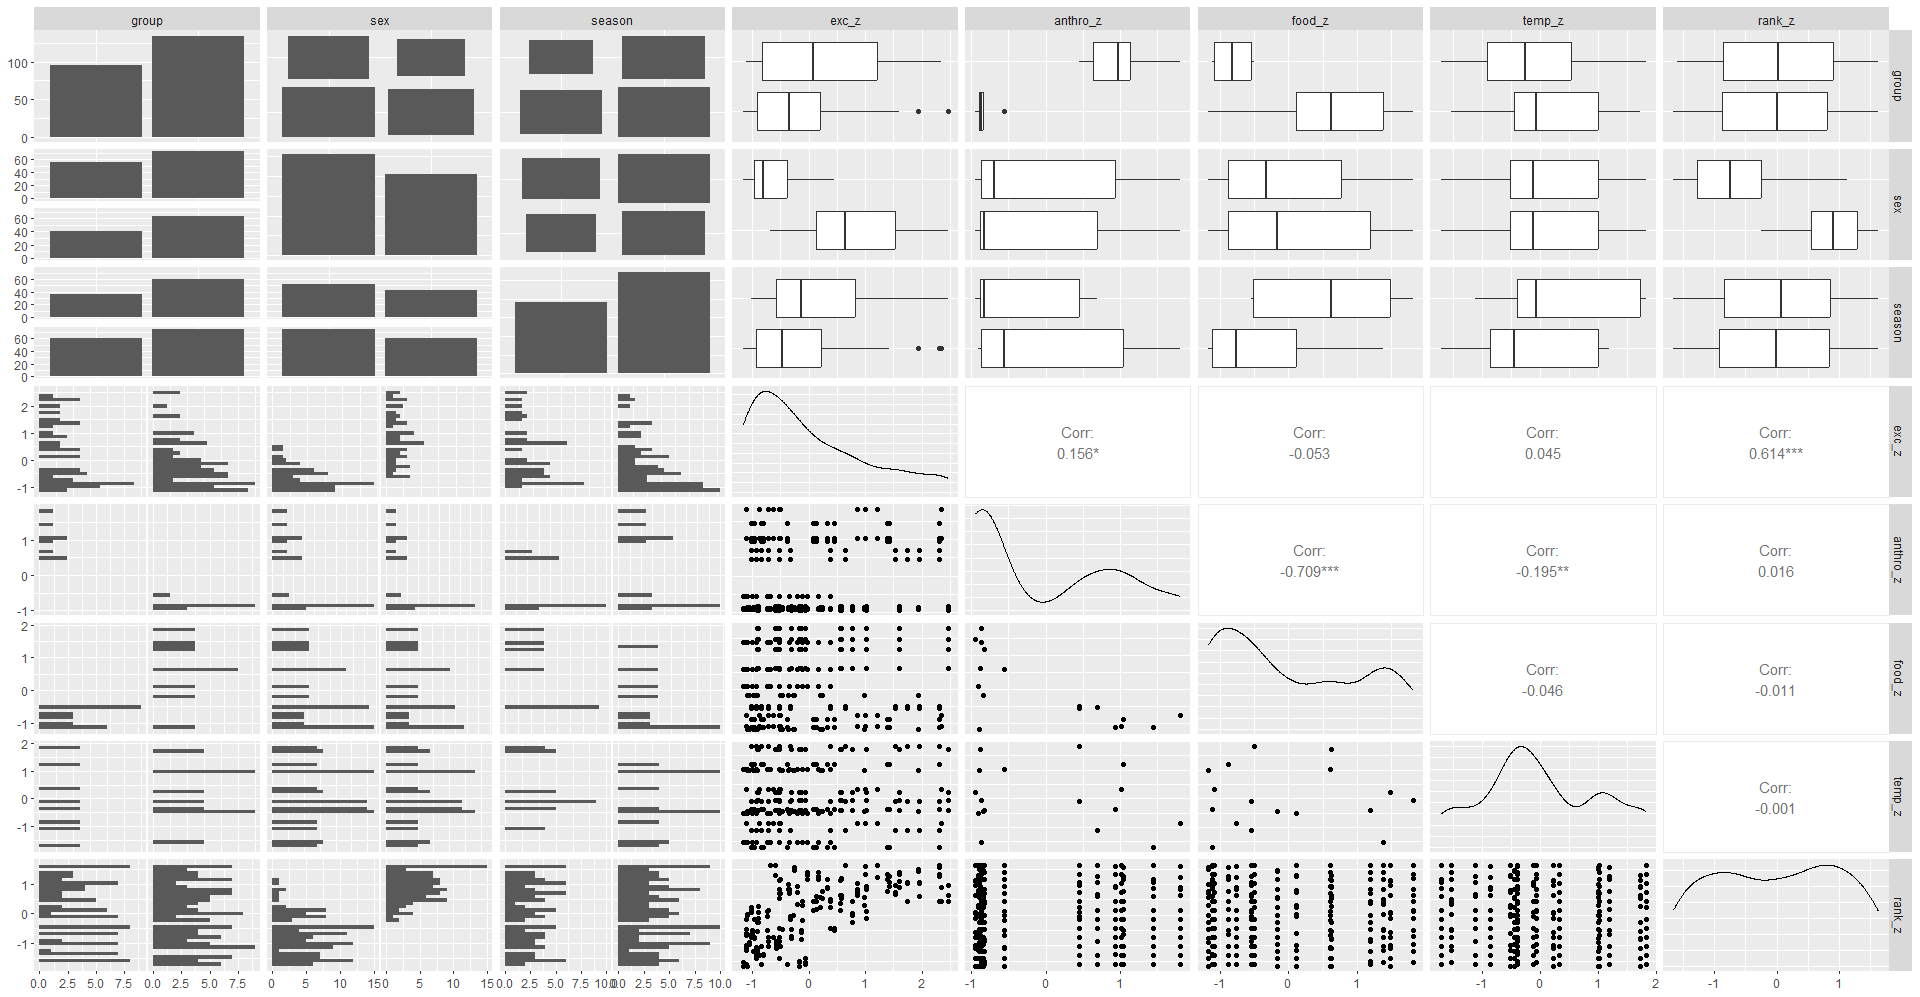


*Figure S24:* Correlations between variables included in models 2 and 3 (“Plasticity in Social Connectivity”). The plot was generated using the *ggpairs* function of the *GGally* package (Schloerke et al, 2024; full reference in main manuscript).

*Table S25:* Model validation values for “Model 1: Plasticity in social decision making in relation to current social environment”. ESS refers to “effective samples size” of the model.

| **Level** | **Rhat** | **Bulk_ESS** | **Tail_ESS** |
| --- | --- | --- | --- |
| **Fixed effects** |  |  |  |
| Intercept | 1.000 | 2387 | 2500 |
| exc_z | 1.000 | 2368 | 3369 |
| anthrop_z | 1.000 | 2285 | 2587 |
| consprox_z | 1.000 | 2632 | 2855 |
| rankdiff_z | 1.000 | 2890 | 2953 |
| temp_z | 1.000 | 3013 | 3211 |
| rank_z | 1.000 | 3039 | 3324 |
| time_z | 1.000 | 3298 | 3305 |
| Itime_zE2 | 1.000 | 2373 | 2846 |
| sexM | 1.000 | 2748 | 2876 |
| groupG | 1.000 | 2404 | 2747 |
| exc_z:anthrop_z | 1.000 | 3200 | 3255 |
| exc_z:consprox_z | 1.000 | 3385 | 3398 |
| exc_z:rankdiff_z | 1.000 | 2621 | 2943 |
| **Random effects, slopes and correlations** | |  |  |
| *~date_obs* |  |  |  |
| sd(Intercept) | 1.000 | 1136 | 1493 |
| *~subject* |  |  |  |
| sd(Intercept) | 1.000 | 1606 | 1201 |
| sd(anthrop_z) | 1.000 | 1790 | 2628 |
| sd(consprox_z) | 1.000 | 1830 | 2336 |
| sd(rankdiff_z) | 1.000 | 1298 | 1208 |
| sd(temp_z) | 1.000 | 1634 | 1325 |
| sd(rank_z) | 1.000 | 2033 | 2937 |
| sd(time_z) | 1.000 | 2296 | 2305 |
| sd(Itime_zE2) | 1.000 | 1381 | 2365 |
| cor(Intercept,anthrop_z) | 1.000 | 3081 | 3275 |
| cor(Intercept,consprox_z) | 1.000 | 2900 | 3182 |
| cor(anthrop_z,consprox_z) | 1.000 | 2551 | 3397 |
| cor(Intercept,rankdiff_z) | 1.000 | 2344 | 3351 |
| cor(anthrop_z,rankdiff_z) | 1.000 | 2462 | 3062 |
| cor(consprox_z,rankdiff_z) | 1.000 | 2531 | 3122 |
| cor(Intercept,temp_z) | 1.000 | 2670 | 3047 |
| cor(anthrop_z,temp_z) | 1.000 | 2524 | 3076 |
| cor(consprox_z,temp_z) | 1.000 | 2894 | 2988 |
| cor(rankdiff_z,temp_z) | 1.000 | 2640 | 3035 |
| cor(Intercept,rank_z) | 1.000 | 2986 | 2969 |
| cor(anthrop_z,rank_z) | 1.000 | 3153 | 3503 |
| cor(consprox_z,rank_z) | 1.000 | 3360 | 3272 |
| cor(rankdiff_z,rank_z) | 1.000 | 3111 | 3219 |
| cor(temp_z,rank_z) | 1.000 | 3279 | 3498 |
| cor(Intercept,time_z) | 1.000 | 3309 | 3229 |
| cor(anthrop_z,time_z) | 1.000 | 3056 | 3269 |
| cor(consprox_z,time_z) | 1.000 | 3023 | 3385 |
| cor(rankdiff_z,time_z) | 1.000 | 3249 | 3332 |
| cor(temp_z,time_z) | 1.000 | 2942 | 2898 |
| cor(rank_z,time_z) | 1.000 | 3052 | 3240 |
| cor(Intercept,Itime_zE2) | 1.000 | 2815 | 3137 |
| cor(anthrop_z,Itime_zE2) | 1.000 | 2408 | 3208 |
| cor(consprox_z,Itime_zE2) | 1.000 | 2501 | 2744 |
| cor(rankdiff_z,Itime_zE2) | 1.000 | 2686 | 3004 |
| cor(temp_z,Itime_zE2) | 1.000 | 3519 | 3362 |
| cor(rank_z,Itime_zE2) | 1.000 | 3099 | 3736 |
| cor(time_z,Itime_zE2) | 1.000 | 3037 | 3185 |
| sd(Intercept) | 1.000 | 1606 | 1201 |
| sd(anthrop_z) | 1.000 | 1790 | 2628 |
| sd(consprox_z) | 1.000 | 1830 | 2336 |
| sd(rankdiff_z) | 1.000 | 1298 | 1208 |
| sd(temp_z) | 1.000 | 1634 | 1325 |
| sd(rank_z) | 1.000 | 2033 | 2937 |
| sd(time_z) | 1.000 | 2296 | 2305 |
| sd(Itime_zE2) | 1.000 | 1381 | 2365 |
| cor(Intercept,anthrop_z) | 1.000 | 3081 | 3275 |
|  |  |  |  |

*Table S26:* Model validation values for “Model 2: Plasticity in social connectivity – out-degree”. ESS refers to “effective samples size” of the model.

| **Level** | **Rhat** | **Bulk_ESS** | **Tail_ESS** |
| --- | --- | --- | --- |
| **Fixed effects** |  |  |  |
| Intercept | 1.000 | 2869 | 3224 |
| exc_z | 1.000 | 2391 | 2953 |
| seasonNonMmating | 1.000 | 2669 | 2895 |
| anthro_z | 1.000 | 2814 | 3211 |
| food_z | 1.000 | 3077 | 3310 |
| temp_z | 1.000 | 3234 | 3532 |
| rank_z | 1.000 | 3215 | 3226 |
| sexM | 1.000 | 2790 | 3054 |
| exc_z:seasonNonMmating | 1.000 | 2725 | 3012 |
| exc_z:anthro_z | 1.000 | 2605 | 3364 |
| exc_z:food_z | 1.000 | 2579 | 3308 |
| exc_z:temp_z | 1.000 | 2523 | 2805 |
| **Random effects, slopes and correlations** | |  |  |
| *~subject_ID* |  |  |  |
| sd(Intercept) | 1.000 | 1611 | 1861 |
| sd(seasonNonMmating) | 1.000 | 1129 | 1074 |
| sd(anthro_z) | 1.000 | 1368 | 2097 |
| sd(food_z) | 1.000 | 1780 | 2890 |
| sd(temp_z) | 1.000 | 1417 | 1801 |
| cor(Intercept,seasonNonMmating) | 1.000 | 1916 | 2103 |
| cor(Intercept,anthro_z) | 1.000 | 2664 | 2782 |
| cor(seasonNonMmating,anthro_z) | 1.000 | 3194 | 3218 |
| cor(Intercept,food_z) | 1.000 | 2605 | 3050 |
| cor(seasonNonMmating,food_z) | 1.000 | 2567 | 3210 |
| cor(anthro_z,food_z) | 1.000 | 3202 | 3464 |
| cor(Intercept,temp_z) | 1.000 | 2860 | 2783 |
| cor(seasonNonMmating,temp_z) | 1.000 | 2932 | 2817 |
| cor(anthro_z,temp_z) | 1.000 | 2482 | 2775 |
| cor(food_z,temp_z) | 1.000 | 2744 | 3487 |
| **Distribution parameters** |  |  |  |
| phi | 1.000 | 1893 | 2125 |

*Table S27:* Model validation values for “Model 3: Plasticity in social connectivity – strength”. ESS refers to “effective samples size” of the model.

| **Level** | **Rhat** | **Bulk_ESS** | **Tail_ESS** |
| --- | --- | --- | --- |
| **Fixed effects** |  |  |  |
| Intercept | 1.000 | 1758 | 2665 |
| exc_z | 1.000 | 1976 | 2602 |
| seasonNonMmating | 1.000 | 1775 | 2725 |
| anthro_z | 1.000 | 2730 | 3256 |
| food_z | 1.000 | 2409 | 2656 |
| temp_z | 1.000 | 3017 | 3360 |
| rank_z | 1.000 | 2709 | 3119 |
| sexM | 1.000 | 2978 | 3116 |
| exc_z:seasonNonMmating | 1.000 | 2034 | 2660 |
| exc_z:anthro_z | 1.000 | 3130 | 3324 |
| exc_z:food_z | 1.000 | 3103 | 3264 |
| exc_z:temp_z | 1.000 | 3165 | 3328 |
| **Random effects, slopes and correlations** |  |  |  |
| *~subject_ID* |  |  |  |
| sd(Intercept) | 1.000 | 1877 | 2209 |
| sd(seasonNonMmating) | 1.000 | 2247 | 2874 |
| sd(anthro_z) | 1.000 | 2533 | 3053 |
| sd(food_z) | 1.000 | 1671 | 2807 |
| sd(temp_z) | 1.000 | 2797 | 3053 |
| cor(Intercept,seasonNonMmating) | 1.000 | 2047 | 2530 |
| cor(Intercept,anthro_z) | 1.000 | 3132 | 3495 |
| cor(seasonNonMmating,anthro_z) | 1.000 | 3168 | 3370 |
| cor(Intercept,food_z) | 1.000 | 2648 | 2867 |
| cor(seasonNonMmating,food_z) | 1.000 | 2298 | 2924 |
| cor(anthro_z,food_z) | 1.000 | 2996 | 3508 |
| cor(Intercept,temp_z) | 1.000 | 2555 | 2777 |
| cor(seasonNonMmating,temp_z) | 1.000 | 3048 | 3263 |
| cor(anthro_z,temp_z) | 1.000 | 2618 | 3301 |
| cor(food_z,temp_z) | 1.000 | 2630 | 3048 |
| **Distribution parameters** |  |  |  |
| phi | 1.000 | 2722 | 3326 |


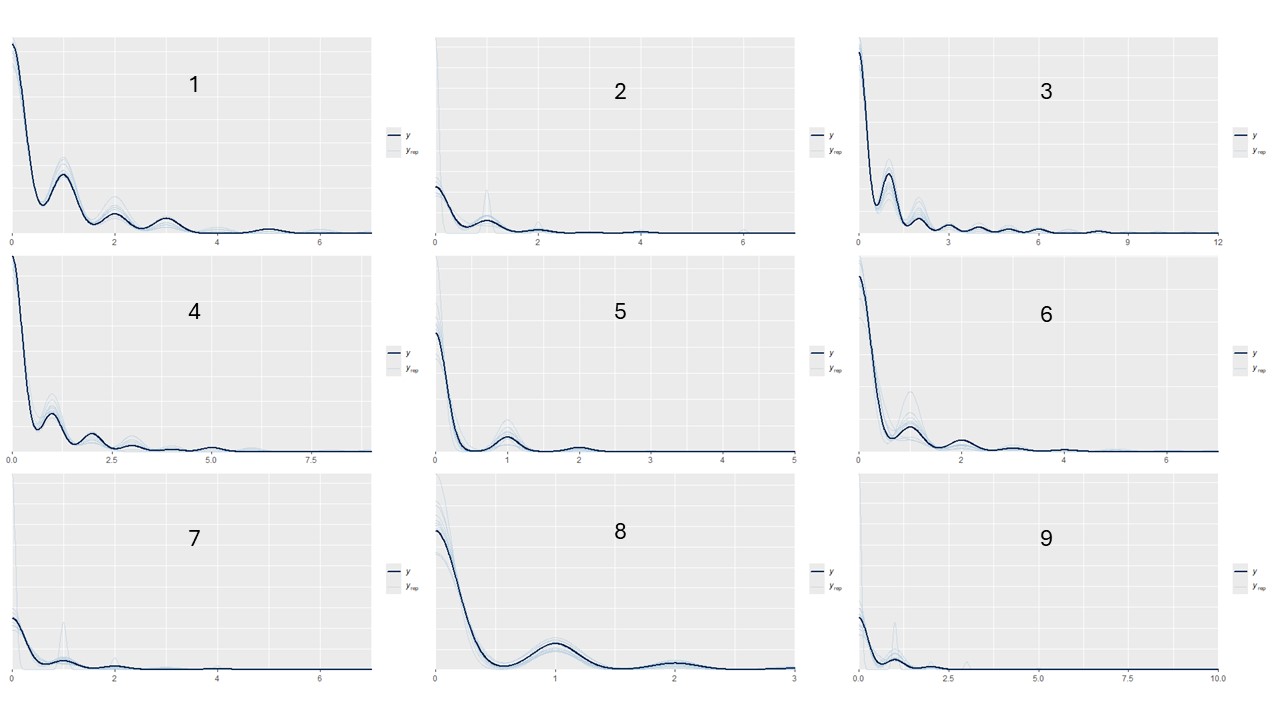


*Figure S28:* Posterior predictive checks of the response (times dyads were observed grooming) from the models used to estimate the grooming network edge weights for the Blue group across 9 different time windows. The dark blue (y) represents the observed edge weights, the light blue lines (yrep) are 100 draws from the posterior of each respective model.


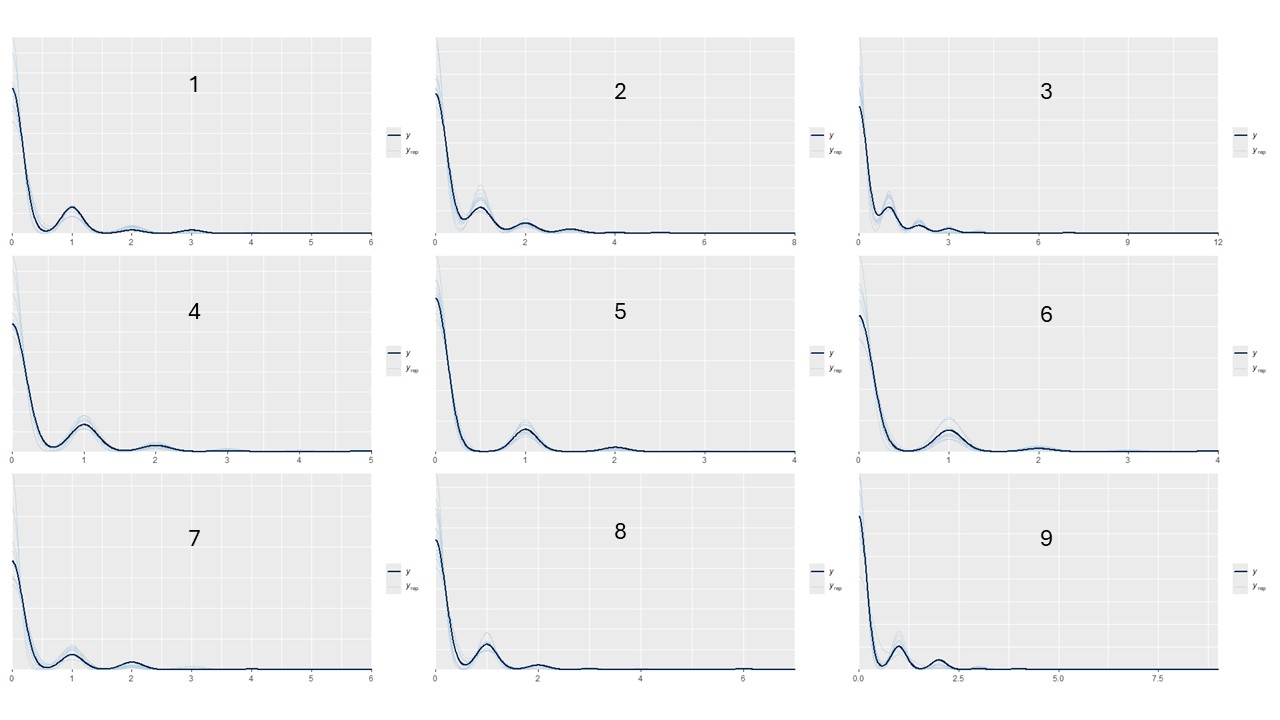


*Figure S29:* Posterior predictive checks of the response (times dyads were observed grooming) from the models used to estimate the grooming network edge weights for the Green group across 9 different time windows. The dark blue (y) represents the observed edge weights, the light blue lines (yrep) are 100 draws from the posterior of each respective model.


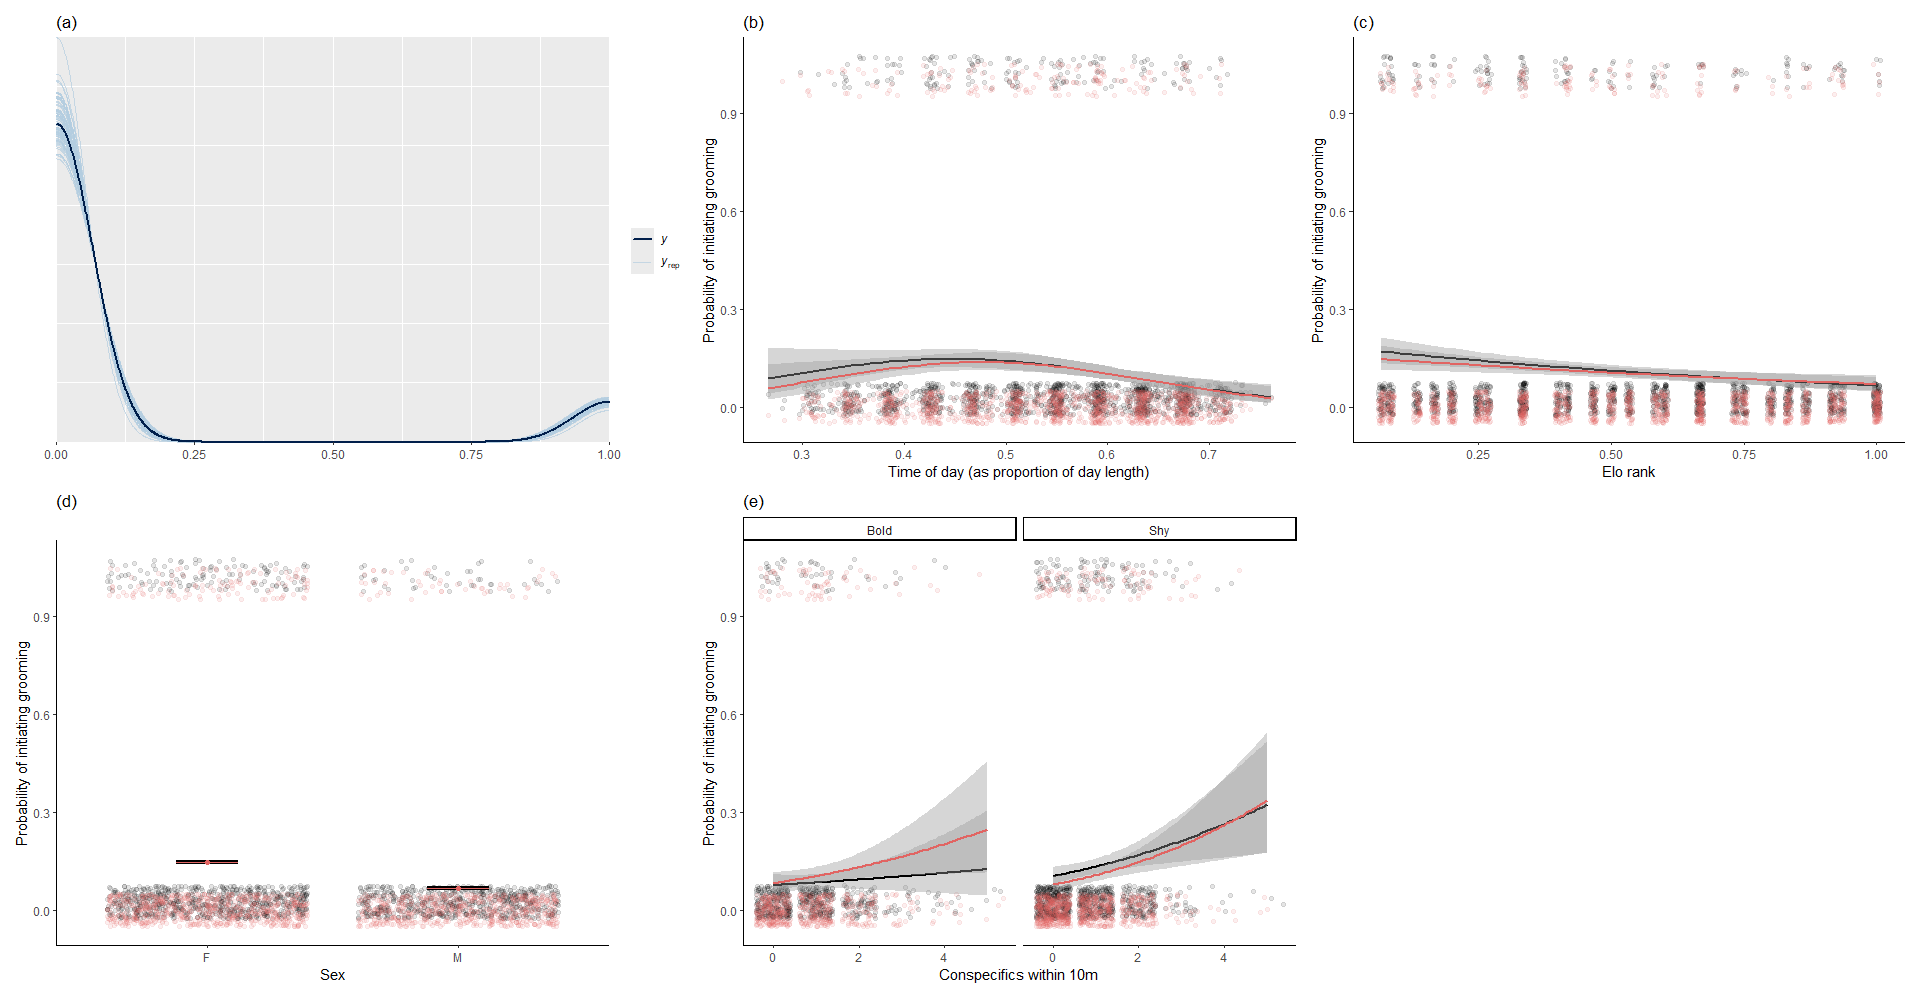


*Figure S30:* Posterior predictive checks for “Model 1: Plasticity in social decision making in relation to current social environment”. In (a), the dark blue (y) represents the overall observed probability to initiate grooming, the light blue lines (yrep) are 100 draws from the posterior representing estimated overall probability to initiate grooming. For (b), (c), (d), and (e), the relationships between the main effects found in Model 1 and probability to initiate grooming are plotted. For (b), (c) and (e), the black points and regression lines represent the observed probability to initiate grooming, the red points and regression lines are 100 draws from the posterior representing estimated probability to initiate grooming. The grey lines around the regression lines represent the 90% credible intervals. In (d), the horizontal black and red lines represented the observed and predicted means respectively.


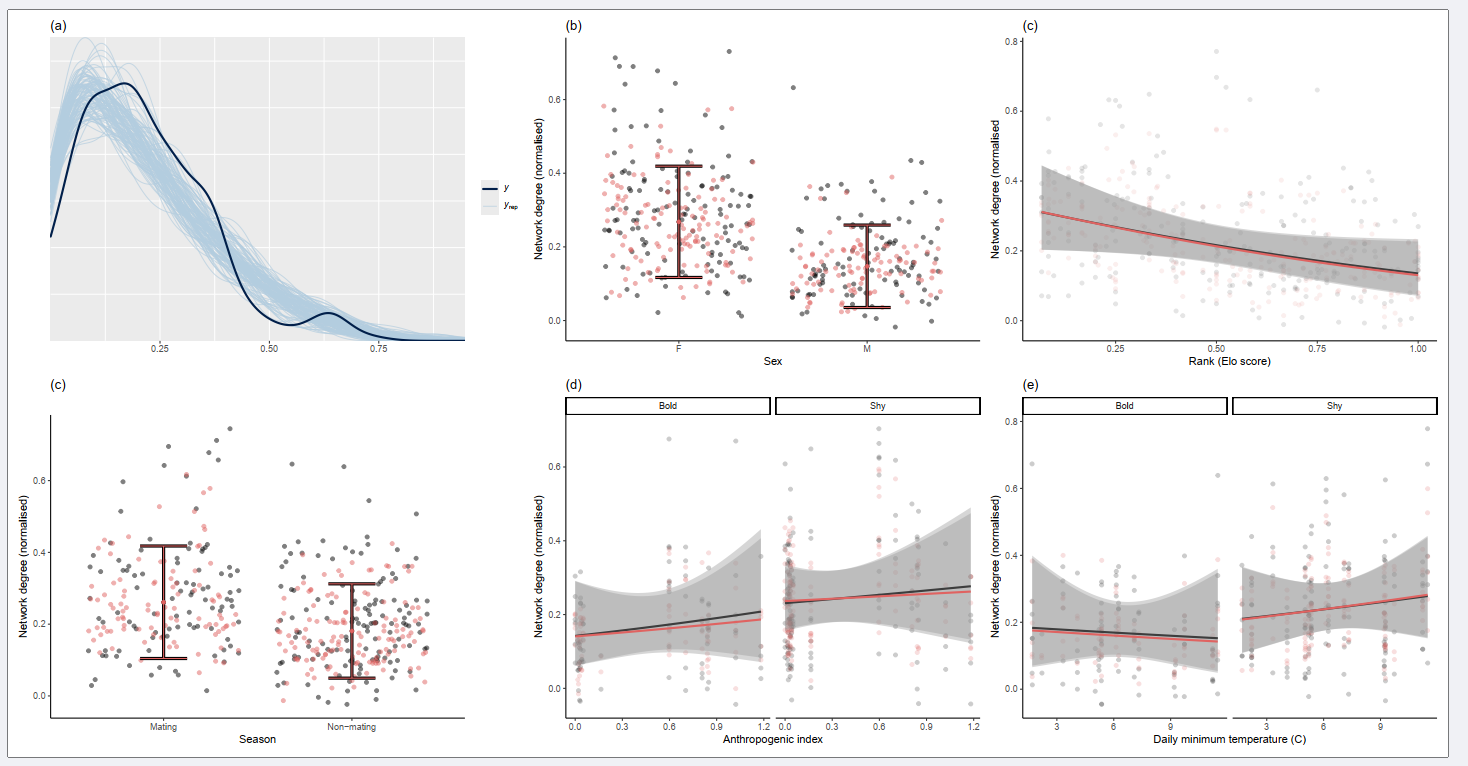


*Figure S31:* Posterior predictive checks for “Model 2: Plasticity in social connectivity – out-degree”. In (a), the dark blue (y) represents the overall observed network out-degree, the light blue lines (yrep) are 100 draws from the posterior representing estimated overall network out-degree. For (b), (c), (d) and (e), the relationships between the main effects found in Model 2 and network out-degree are plotted. Here, the black points and regression lines represent the observed network out-degree, the red points and regression lines are 100 draws from the posterior representing estimated network out-degree. The grey lines around the regression lines represent the 90% credible intervals.


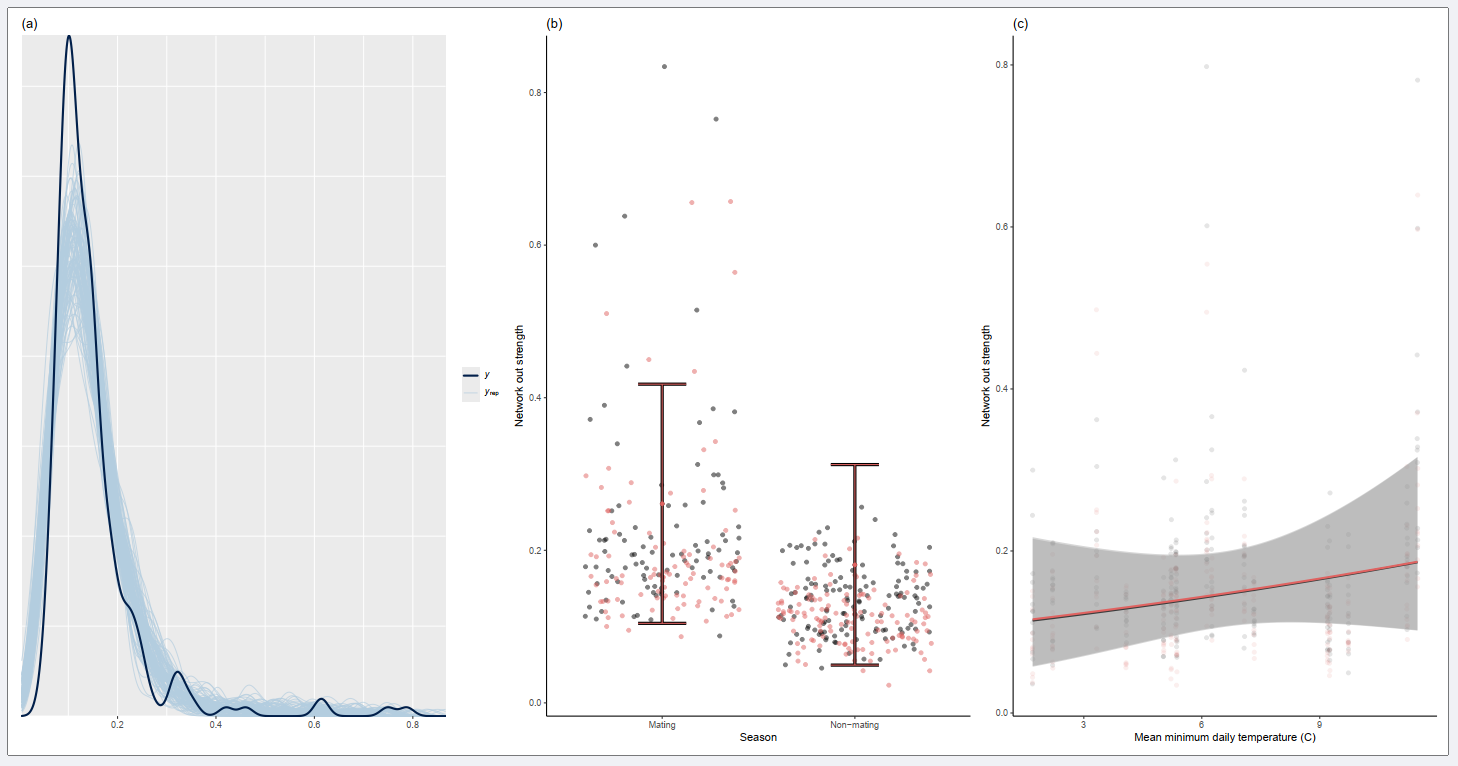


*Figure S32:* Posterior predictive checks for “Model 3: Plasticity in social connectivity – strength”. In (a), the dark blue (y) represents the overall observed network strength, the light blue lines (yrep) are 100 draws from the posterior representing estimated overall network strength. For (b) and (c), the relationships between the main effects found in Model 3 and network strength are plotted. Here, the black points and regression lines represent the observed network out-degree, the red points and regression lines are 100 draws from the posterior representing estimated network strength. The grey lines around the regression lines represent the 90% credible intervals.

*Table S33:* Fixed and random effect/slope estimates from supplementary “Plasticity in social decision making in relation to current social environment” model, here using a 5-minute interval for the social choice. Fixed effect estimates supported by more than 95% of the posterior are highlighted in bold; fixed effect estimates supported by more than 90% of the posterior are highlighted in italics. For categorical variables, the reference level is in parentheses.

|  | **Estimate** | **Est error** | **Lower**  **90% CI** | **Upper**  **90% CI** |
| --- | --- | --- | --- | --- |
| **Fixed effects** |  |  |  |  |
| Intercept | -3.283 | 0.441 | -4.040 | -2.591 |
| Excitability/Boldness score | 0.154 | 0.258 | -0.267 | 0.574 |
| **Number of humans within 10m** | **-1.543** | **0.637** | **-2.687** | **-0.592** |
| *Number of conspecifics within 10m* | *0.258* | *0.169* | *-0.021* | *0.531* |
| Maximum rank difference with bystander | 0.118 | 0.181 | -0.175 | 0.419 |
| Daily minimum temperature | 0.083 | 0.160 | -0.187 | 0.338 |
| *Rank* | *-0.476* | *0.310* | *-0.998* | *0.017* |
| *Time of day* | *-0.253* | *0.192* | *-0.581* | *0.048* |
| **Time of day2** | **-0.553** | **0.224** | **-0.934** | **-0.223** |
| Sex (female) | -0.360 | 0.596 | -1.342 | 0.610 |
| Group (Blue group) | 0.051 | 0.425 | -0.632 | 0.747 |
| Excitability/Boldness score*Number of humans within 10m | -0.199 | 0.570 | -1.185 | 0.660 |
| *Excitability/Boldness score*Number of conspecifics within 10m* | *-0.246* | *0.167* | *-0.538* | *0.017* |
| Excitability/Boldness score*Max rank difference with bystander | 0.145 | 0.155 | -0.125 | 0.395 |
|  |  |  |  |  |
| **Random effects and slopes** |  |  |  |  |
| Day of observation | 0.274 | 0.193 | 0.022 | 0.644 |
| Individual identity – Intercept | 0.549 | 0.316 | 0.067 | 1.092 |
| Individual identity – Excitability/Boldness score | 0.775 | 0.712 | 0.052 | 2.161 |
| Individual identity – Number of humans within 10m | 0.300 | 0.217 | 0.025 | 0.700 |
| Individual identity – Number of conspecifics within 10m | 0.175 | 0.136 | 0.013 | 0.435 |
| Individual identity – Max rank difference with bystander | 0.269 | 0.187 | 0.024 | 0.619 |
| Individual identity – Daily minimum temperature | 0.488 | 0.343 | 0.037 | 1.111 |
| Individual identity – Rank | 0.316 | 0.220 | 0.030 | 0.711 |
| Individual identity – Time of day | 0.319 | 0.229 | 0.033 | 0.737 |
| Individual identity – Time of day2 | 0.274 | 0.193 | 0.022 | 0.644 |
|  |  |  |  |  |

*Table S34:* Fixed and random effect/slope estimates from supplementary “Plasticity in social decision making in relation to current social environment” model, here using a 30-minute interval for the social choice. Fixed effect estimates supported by more than 95% of the posterior are highlighted in bold; fixed effect estimates supported by more than 90% of the posterior are highlighted in italics. For categorical variables, the reference level is in parentheses.

|  | **Estimate** | **Est error** | **Lower**  **90% CI** | **Upper**  **90% CI** |
| --- | --- | --- | --- | --- |
| **Fixed effects** |  |  |  |  |
| Intercept | -1.423 | 0.347 | -2.012 | -0.885 |
| Excitability/Boldness | 0.068 | 0.186 | -0.247 | 0.365 |
| *Number of humans within 10m* | *-0.229* | *0.177* | *-0.549* | *0.014* |
| Number of conspecifics within 10m | 0.067 | 0.107 | -0.112 | 0.242 |
| **Maximum rank difference with bystander** | **0.228** | **0.129** | **0.014** | **0.445** |
| *Daily minimum temperature* | 0.101 | 0.110 | -0.079 | 0.280 |
| **Individual rank** | **-0.382** | **0.202** | **-0.723** | **-0.064** |
| **Time of day** | **-0.180** | **0.098** | **-0.342** | **-0.021** |
| **Time of day2** | **-0.275** | **0.103** | **-0.450** | **-0.114** |
| Sex (female) | -0.647 | 0.490 | -1.419 | 0.180 |
| Group (Blue) | -0.035 | 0.359 | -0.619 | 0.546 |
| *Excitability/Boldness:Number of humans within 10m* | *0.112* | *0.129* | *-0.086* | *0.325* |
| **Excitability/Boldness:Number of conspecifics within 10m** | **-0.237** | **0.108** | **-0.418** | **-0.066** |
| *Excitability/Boldness:Maximum rank difference with bystander* | 0.069 | 0.107 | -0.108 | 0.246 |
|  |  |  |  |  |
| **Random effects and slopes** |  |  |  |  |
| Day of observation: Intercept | 0.491 | 0.151 | 0.235 | 0.735 |
| Individual identity: Intercept | 0.732 | 0.207 | 0.428 | 1.102 |
| Individual identity: Slope for Number of humans within 10m | 0.227 | 0.197 | 0.017 | 0.612 |
| Individual identity: Slope for Number of conspecifics within 10m | 0.200 | 0.142 | 0.016 | 0.462 |
| Individual identity: Slope for Maximum rank difference | 0.307 | 0.169 | 0.043 | 0.596 |
| Individual identity: Slope for Daily minimum temperature | 0.219 | 0.137 | 0.023 | 0.458 |
| Individual identity: Slope for Individual rank | 0.277 | 0.212 | 0.023 | 0.681 |
| Individual identity: Slope for Time of day | 0.155 | 0.116 | 0.012 | 0.376 |
| Individual identity: Slope for Time of day2 | 0.183 | 0.133 | 0.018 | 0.427 |
| Intercept | -1.423 | 0.347 | -2.012 | -0.885 |
|  |  |  |  |  |


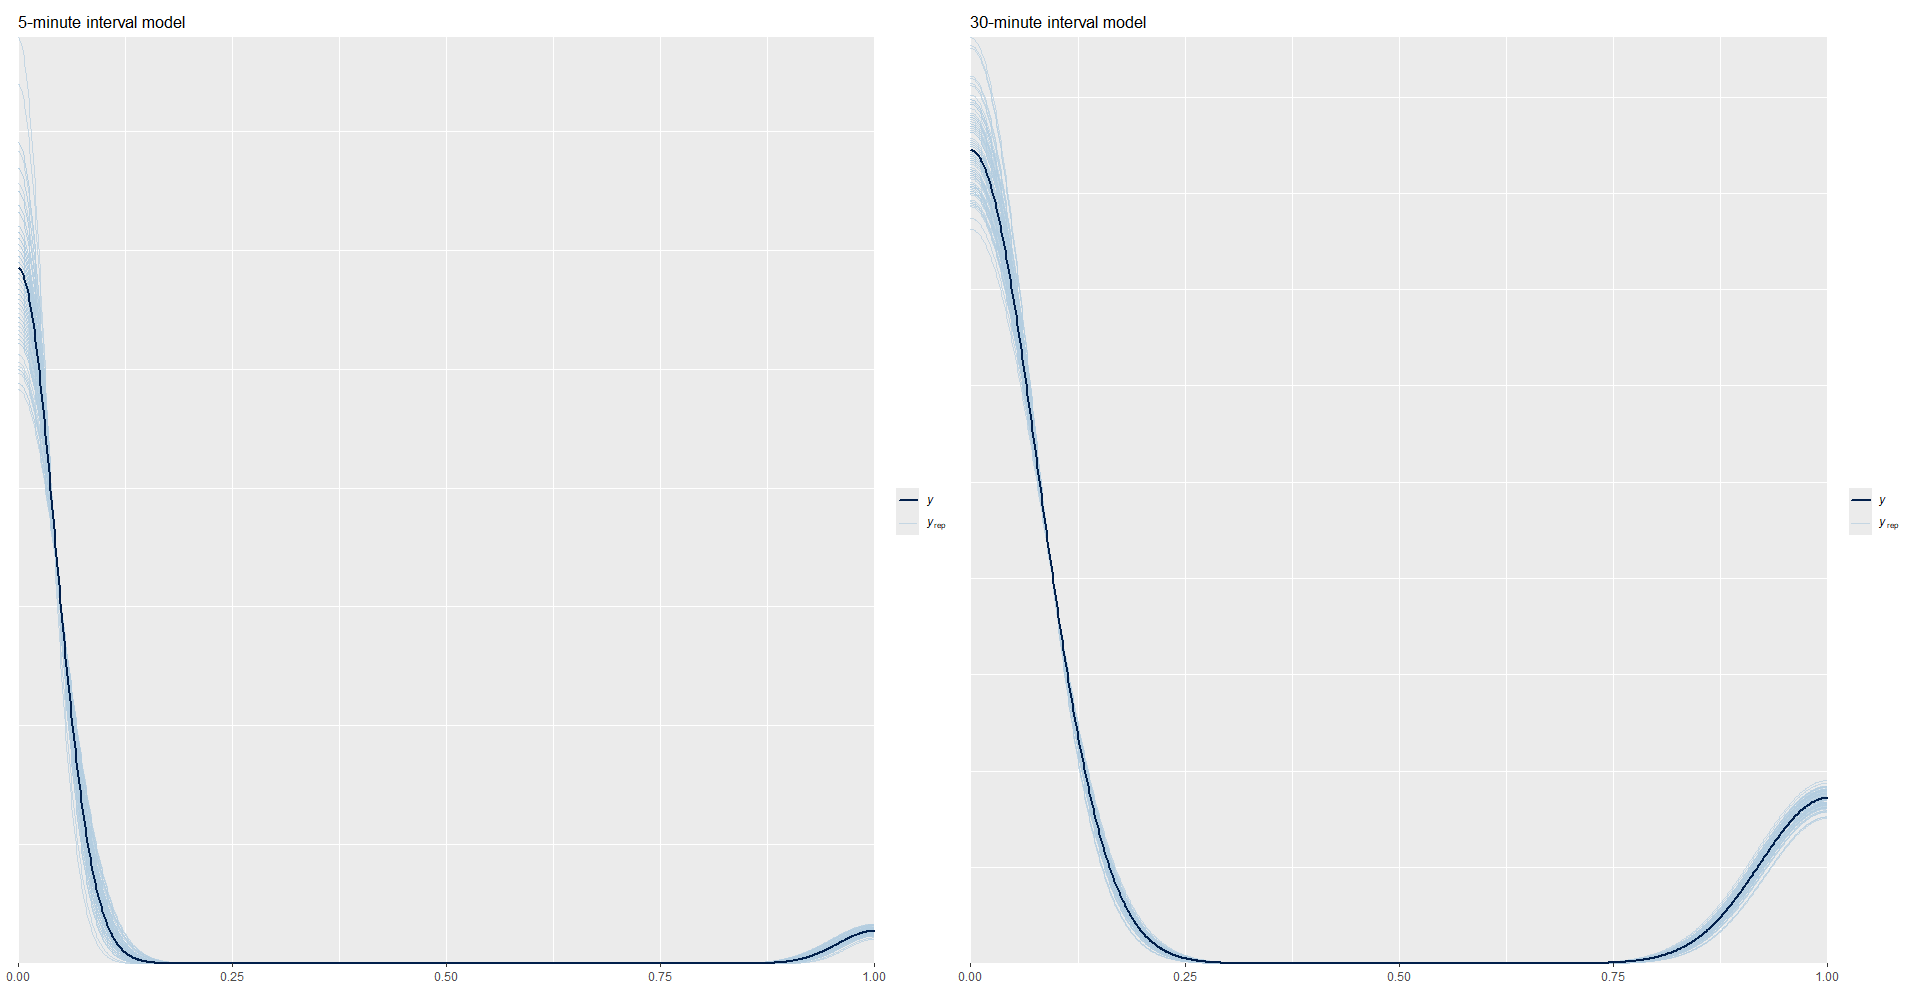


*Figure S35:* Posterior predictive checks for supplementary versions of “Model 1: Plasticity in social decision making” using 5- and 30-minute intervals. The dark blue (y) represents the overall density of observed probability to initiate grooming, the light blue lines (yrep) are 100 draws from the posterior represent the density of the estimated probabilities.
